# Supplementary material for: Genome-Wide Identification of Cotton MicroRNAs Predicted for Targeting Cotton Leaf Curl Kokhran Virus-Lucknow
Source: Preprints.org preprint supplement (doi:10.20944/preprints202309.1992.v1), 2023-09-28
Supplement: Supplementary file 1 [file supplementary]

=====

```
miranda v3.3a      microRNA Target Scanning Algorithm
```

=====

(c) 2003 Memorial Sloan-Kettering Cancer Center, New York

Authors: Anton Enright, Bino John, Chris Sander and Debora Marks  
(mirnatargets (at) cbio.mskcc.org - reaches all authors)

Software written by: Anton Enright  
Distributed for anyone to use under the GNU Public License (GPL),  
See the files 'COPYING' and 'LICENSE' for details

If you use this software please cite:  
Enright AJ, John B, Gaul U, Tuschl T, Sander C and Marks DS;  
(2003) Genome Biology; 5(1):R1.

miranda comes with ABSOLUTELY NO WARRANTY;  
This is free software, and you are welcome to redistribute it  
under certain conditions; type `miranda --license' for details.

Current Settings:

=====

```
Query Filename:  ./seq/mirna/cotton_mirna.fasta
Reference Filename:  ./seq/gene/cotton/GU385879.fasta
Gap Open Penalty:-9.000000
Gap Extend Penalty:  -4.000000
Score Threshold: 140.000000
Energy Threshold:-20.000000 kcal/mol
Scaling Parameter:   4.000000
```

=====

```
Read Sequence:ghr-miR156a (20 nt)
Read Sequence:GU385879.2 Cotton Leaf Curl Kokhran Virus-Lucknow CLCuKoV-
Lu [IN-Luc-Ct-Bea10]□(2736 nt)
```

=====

```
Performing Scan: ghr-miR156a vs GU385879.2
```

=====

Score for this Scan:  
No Hits Found above Threshold  
Complete

```
Read Sequence:ghr-miR156b (20 nt)
Read Sequence:GU385879.2 Cotton Leaf Curl Kokhran Virus-Lucknow CLCuKoV-
Lu [IN-Luc-Ct-Bea10]□(2736 nt)
```

=====

```
Performing Scan: ghr-miR156b vs GU385879.2
```

=====

Score for this Scan:  
No Hits Found above Threshold  
Complete

Read Sequence:ghr-miR156c (20 nt)

Read Sequence:GU385879.2 Cotton Leaf Curl Kokhran Virus-Lucknow CLCuKoV-Lu [IN-Luc-Ct-Bea10] (2736 nt)

Performing Scan: ghr-miR156c vs GU385879.2

Score for this Scan:

No Hits Found above Threshold

Complete

Read Sequence:ghr-miR156d (20 nt)

Read Sequence:GU385879.2 Cotton Leaf Curl Kokhran Virus-Lucknow CLCuKoV-Lu [IN-Luc-Ct-Bea10] (2736 nt)

Performing Scan: ghr-miR156d vs GU385879.2

Score for this Scan:

No Hits Found above Threshold

Complete

Read Sequence:ghr-miR160 (21 nt)

Read Sequence:GU385879.2 Cotton Leaf Curl Kokhran Virus-Lucknow CLCuKoV-Lu [IN-Luc-Ct-Bea10] (2736 nt)

Performing Scan: ghr-miR160 vs GU385879.2

Score for this Scan:

No Hits Found above Threshold

Complete

Read Sequence:ghr-miR162a (21 nt)

Read Sequence:GU385879.2 Cotton Leaf Curl Kokhran Virus-Lucknow CLCuKoV-Lu [IN-Luc-Ct-Bea10] (2736 nt)

Performing Scan: ghr-miR162a vs GU385879.2

Score for this Scan:

No Hits Found above Threshold

Complete

Read Sequence:ghr-miR164 (21 nt)

Read Sequence:GU385879.2 Cotton Leaf Curl Kokhran Virus-Lucknow CLCuKoV-Lu [IN-Luc-Ct-Bea10] (2736 nt)

Performing Scan: ghr-miR164 vs GU385879.2

Score for this Scan:

No Hits Found above Threshold

Complete

Read Sequence:ghr-miR166b (21 nt)

Read Sequence:GU385879.2 Cotton Leaf Curl Kokhran Virus-Lucknow CLCuKoV-Lu [IN-Luc-Ct-Bea10] (2736 nt)

Performing Scan: ghr-miR166b vs GU385879.2

=====  
Score for this Scan:  
No Hits Found above Threshold  
Complete

Read Sequence:ghr-miR167a (21 nt)  
Read Sequence:GU385879.2 Cotton Leaf Curl Kokhran Virus-Lucknow CLCuKoV-Lu [IN-Luc-Ct-Bea10]□(2736 nt)

=====  
Performing Scan: ghr-miR167a vs GU385879.2  
=====

Score for this Scan:  
No Hits Found above Threshold  
Complete

Read Sequence:ghr-miR167b (21 nt)  
Read Sequence:GU385879.2 Cotton Leaf Curl Kokhran Virus-Lucknow CLCuKoV-Lu [IN-Luc-Ct-Bea10]□(2736 nt)

=====  
Performing Scan: ghr-miR167b vs GU385879.2  
=====

Score for this Scan:  
No Hits Found above Threshold  
Complete

Read Sequence:ghr-miR169a (21 nt)  
Read Sequence:GU385879.2 Cotton Leaf Curl Kokhran Virus-Lucknow CLCuKoV-Lu [IN-Luc-Ct-Bea10]□(2736 nt)

=====  
Performing Scan: ghr-miR169a vs GU385879.2  
=====

Score for this Scan:  
No Hits Found above Threshold  
Complete

Read Sequence:ghr-miR169b (21 nt)  
Read Sequence:GU385879.2 Cotton Leaf Curl Kokhran Virus-Lucknow CLCuKoV-Lu [IN-Luc-Ct-Bea10]□(2736 nt)

=====  
Performing Scan: ghr-miR169b vs GU385879.2  
=====

Score for this Scan:  
No Hits Found above Threshold  
Complete

Read Sequence:ghr-miR172 (21 nt)  
Read Sequence:GU385879.2 Cotton Leaf Curl Kokhran Virus-Lucknow CLCuKoV-Lu [IN-Luc-Ct-Bea10]□(2736 nt)

=====  
Performing Scan: ghr-miR172 vs GU385879.2  
=====

Score for this Scan:  
No Hits Found above Threshold  
Complete

Read Sequence:ghr-miR390a (21 nt)  
Read Sequence:GU385879.2 Cotton Leaf Curl Kokhran Virus-Lucknow CLCuKoV-Lu [IN-Luc-Ct-Bea10] (2736 nt)

Performing Scan: ghr-miR390a vs GU385879.2

Forward: Score: 143.000000 Q:2 to 12 R:2278 to 2298 Align Len (10)  
(80.00%) (90.00%)

Query: 3' ccgcgauaggGAGGACUCGAa 5'

| :||||||

Ref: 5' gtaggcctgaCATCTGAGCTt 3'

Energy: -21.480000 kCal/Mol

Scores for this hit:

|              |            |        |        |   |    |      |      |    |
|--------------|------------|--------|--------|---|----|------|------|----|
| >ghr-miR390a | GU385879.2 | 143.00 | -21.48 | 2 | 12 | 2278 | 2298 | 10 |
|              | 80.00%     | 90.00% |        |   |    |      |      |    |

Score for this Scan:

Seq1,Seq2,Tot Score,Tot Energy,Max Score,Max

Energy,Strand,Len1,Len2,Positions

|               |            |        |        |        |        |
|---------------|------------|--------|--------|--------|--------|
| >>ghr-miR390a | GU385879.2 | 143.00 | -21.48 | 143.00 | -21.48 |
|               | 14         | 21     | 2736   | 2278   |        |

Complete

Read Sequence:ghr-miR390b (21 nt)

Read Sequence:GU385879.2 Cotton Leaf Curl Kokhran Virus-Lucknow CLCuKoV-Lu [IN-Luc-Ct-Bea10] (2736 nt)

Performing Scan: ghr-miR390b vs GU385879.2

Forward: Score: 143.000000 Q:2 to 12 R:2278 to 2298 Align Len (10)  
(80.00%) (90.00%)

Query: 3' ccgcgauaggGAGGACUCGAa 5'

| :||||||

Ref: 5' gtaggcctgaCATCTGAGCTt 3'

Energy: -21.480000 kCal/Mol

Scores for this hit:

|              |            |        |        |   |    |      |      |    |
|--------------|------------|--------|--------|---|----|------|------|----|
| >ghr-miR390b | GU385879.2 | 143.00 | -21.48 | 2 | 12 | 2278 | 2298 | 10 |
|              | 80.00%     | 90.00% |        |   |    |      |      |    |

Score for this Scan:

Seq1,Seq2,Tot Score,Tot Energy,Max Score,Max

Energy,Strand,Len1,Len2,Positions

|               |            |        |        |        |        |
|---------------|------------|--------|--------|--------|--------|
| >>ghr-miR390b | GU385879.2 | 143.00 | -21.48 | 143.00 | -21.48 |
|               | 15         | 21     | 2736   | 2278   |        |

Complete

Read Sequence:ghr-miR390c (21 nt)  
Read Sequence:GU385879.2 Cotton Leaf Curl Kokhran Virus-Lucknow CLCuKoV-Lu [IN-Luc-Ct-Bea10] (2736 nt)

Performing Scan: ghr-miR390c vs GU385879.2

Forward: Score: 143.000000 Q:2 to 12 R:2278 to 2298 Align Len (10)  
(80.00%) (90.00%)

Query: 3' ccgcgauaggGAGGACUCGAa 5'

| :|||||||

Ref: 5' gtaggcctgaCATCTGAGCTt 3'

Energy: -21.480000 kCal/Mol

Scores for this hit:

|              |            |        |        |   |    |      |      |    |
|--------------|------------|--------|--------|---|----|------|------|----|
| >ghr-miR390c | GU385879.2 | 143.00 | -21.48 | 2 | 12 | 2278 | 2298 | 10 |
|              | 80.00%     | 90.00% |        |   |    |      |      |    |

Score for this Scan:

Seq1,Seq2,Tot Score,Tot Energy,Max Score,Max

Energy,Strand,Len1,Len2,Positions

|               |            |        |        |        |        |
|---------------|------------|--------|--------|--------|--------|
| >>ghr-miR390c | GU385879.2 | 143.00 | -21.48 | 143.00 | -21.48 |
| 16            | 21         | 2736   | 2278   |        |        |

Complete

Read Sequence:ghr-miR393 (22 nt)

Read Sequence:GU385879.2 Cotton Leaf Curl Kokhran Virus-Lucknow CLCuKoV-Lu [IN-Luc-Ct-Bea10] (2736 nt)

Performing Scan: ghr-miR393 vs GU385879.2

Score for this Scan:

No Hits Found above Threshold

Complete

Read Sequence:ghr-miR394a (20 nt)

Read Sequence:GU385879.2 Cotton Leaf Curl Kokhran Virus-Lucknow CLCuKoV-Lu [IN-Luc-Ct-Bea10] (2736 nt)

Performing Scan: ghr-miR394a vs GU385879.2

Score for this Scan:

No Hits Found above Threshold

Complete

Read Sequence:ghr-miR394b (20 nt)

Read Sequence:GU385879.2 Cotton Leaf Curl Kokhran Virus-Lucknow CLCuKoV-Lu [IN-Luc-Ct-Bea10] (2736 nt)

Performing Scan: ghr-miR394b vs GU385879.2

Score for this Scan:  
No Hits Found above Threshold  
Complete

Read Sequence:ghr-miR396a (21 nt)  
Read Sequence:GU385879.2 Cotton Leaf Curl Kokhran Virus-Lucknow CLCuKoV-Lu [IN-Luc-Ct-Bea10]□(2736 nt)  
=====

Performing Scan: ghr-miR396a vs GU385879.2  
=====

Score for this Scan:  
No Hits Found above Threshold  
Complete

Read Sequence:ghr-miR396b (21 nt)  
Read Sequence:GU385879.2 Cotton Leaf Curl Kokhran Virus-Lucknow CLCuKoV-Lu [IN-Luc-Ct-Bea10]□(2736 nt)  
=====

Performing Scan: ghr-miR396b vs GU385879.2  
=====

Score for this Scan:  
No Hits Found above Threshold  
Complete

Read Sequence:ghr-miR398 (21 nt)  
Read Sequence:GU385879.2 Cotton Leaf Curl Kokhran Virus-Lucknow CLCuKoV-Lu [IN-Luc-Ct-Bea10]□(2736 nt)  
=====

Performing Scan: ghr-miR398 vs GU385879.2  
=====

Score for this Scan:  
No Hits Found above Threshold  
Complete

Read Sequence:ghr-miR399a (21 nt)  
Read Sequence:GU385879.2 Cotton Leaf Curl Kokhran Virus-Lucknow CLCuKoV-Lu [IN-Luc-Ct-Bea10]□(2736 nt)  
=====

Performing Scan: ghr-miR399a vs GU385879.2  
=====

Score for this Scan:  
No Hits Found above Threshold  
Complete

Read Sequence:ghr-miR399b (21 nt)  
Read Sequence:GU385879.2 Cotton Leaf Curl Kokhran Virus-Lucknow CLCuKoV-Lu [IN-Luc-Ct-Bea10]□(2736 nt)  
=====

Performing Scan: ghr-miR399b vs GU385879.2  
=====

Score for this Scan:  
No Hits Found above Threshold  
Complete

Read Sequence:ghr-miR399c (21 nt)  
Read Sequence:GU385879.2 Cotton Leaf Curl Kokhran Virus-Lucknow CLCuKoV-Lu [IN-Luc-Ct-Bea10]□(2736 nt)  
=====

Performing Scan: ghr-miR399c vs GU385879.2  
=====

Score for this Scan:  
No Hits Found above Threshold  
Complete

Read Sequence:ghr-miR399d (21 nt)  
Read Sequence:GU385879.2 Cotton Leaf Curl Kokhran Virus-Lucknow CLCuKoV-Lu [IN-Luc-Ct-Bea10]□(2736 nt)  
=====

Performing Scan: ghr-miR399d vs GU385879.2  
=====

Score for this Scan:  
No Hits Found above Threshold  
Complete

Read Sequence:ghr-miR399e (21 nt)  
Read Sequence:GU385879.2 Cotton Leaf Curl Kokhran Virus-Lucknow CLCuKoV-Lu [IN-Luc-Ct-Bea10]□(2736 nt)  
=====

Performing Scan: ghr-miR399e vs GU385879.2  
=====

Score for this Scan:  
No Hits Found above Threshold  
Complete

Read Sequence:ghr-miR479 (22 nt)  
Read Sequence:GU385879.2 Cotton Leaf Curl Kokhran Virus-Lucknow CLCuKoV-Lu [IN-Luc-Ct-Bea10]□(2736 nt)  
=====

Performing Scan: ghr-miR479 vs GU385879.2  
=====

Score for this Scan:  
No Hits Found above Threshold  
Complete

Read Sequence:ghr-miR482a (22 nt)  
Read Sequence:GU385879.2 Cotton Leaf Curl Kokhran Virus-Lucknow CLCuKoV-Lu [IN-Luc-Ct-Bea10]□(2736 nt)  
=====

Performing Scan: ghr-miR482a vs GU385879.2  
=====

Score for this Scan:  
No Hits Found above Threshold  
Complete

Read Sequence:ghr-miR482b (22 nt)  
Read Sequence:GU385879.2 Cotton Leaf Curl Kokhran Virus-Lucknow CLCuKoV-Lu [IN-Luc-Ct-Bea10]□(2736 nt)  
=====

Performing Scan: ghr-miR482b vs GU385879.2

=====

Score for this Scan:

No Hits Found above Threshold

Complete

Read Sequence:ghr-miR827a (21 nt)

Read Sequence:GU385879.2 Cotton Leaf Curl Kokhran Virus-Lucknow CLCuKoV-Lu [IN-Luc-Ct-Bea10]□(2736 nt)

=====

Performing Scan: ghr-miR827a vs GU385879.2

=====

Score for this Scan:

No Hits Found above Threshold

Complete

Read Sequence:ghr-miR827b (21 nt)

Read Sequence:GU385879.2 Cotton Leaf Curl Kokhran Virus-Lucknow CLCuKoV-Lu [IN-Luc-Ct-Bea10]□(2736 nt)

=====

Performing Scan: ghr-miR827b vs GU385879.2

=====

Score for this Scan:

No Hits Found above Threshold

Complete

Read Sequence:ghr-miR827c (21 nt)

Read Sequence:GU385879.2 Cotton Leaf Curl Kokhran Virus-Lucknow CLCuKoV-Lu [IN-Luc-Ct-Bea10]□(2736 nt)

=====

Performing Scan: ghr-miR827c vs GU385879.2

=====

Score for this Scan:

No Hits Found above Threshold

Complete

Read Sequence:ghr-miR2948-5p (22 nt)

Read Sequence:GU385879.2 Cotton Leaf Curl Kokhran Virus-Lucknow CLCuKoV-Lu [IN-Luc-Ct-Bea10]□(2736 nt)

=====

Performing Scan: ghr-miR2948-5p vs GU385879.2

=====

Score for this Scan:

No Hits Found above Threshold

Complete

Read Sequence:ghr-miR2949a-5p (22 nt)

Read Sequence:GU385879.2 Cotton Leaf Curl Kokhran Virus-Lucknow CLCuKoV-Lu [IN-Luc-Ct-Bea10]□(2736 nt)

=====

Performing Scan: ghr-miR2949a-5p vs GU385879.2

=====

Score for this Scan:

No Hits Found above Threshold



Complete

Read Sequence:ghr-miR2949b (22 nt)  
Read Sequence:GU385879.2 Cotton Leaf Curl Kokhran Virus-Lucknow CLCuKoV-Lu [IN-Luc-Ct-Bea10]□(2736 nt)  
=====

Performing Scan: ghr-miR2949b vs GU385879.2  
=====

Score for this Scan:  
No Hits Found above Threshold  
Complete

Read Sequence:ghr-miR2949c (22 nt)  
Read Sequence:GU385879.2 Cotton Leaf Curl Kokhran Virus-Lucknow CLCuKoV-Lu [IN-Luc-Ct-Bea10]□(2736 nt)  
=====

Performing Scan: ghr-miR2949c vs GU385879.2  
=====

Score for this Scan:  
No Hits Found above Threshold  
Complete

Read Sequence:ghr-miR2950 (21 nt)  
Read Sequence:GU385879.2 Cotton Leaf Curl Kokhran Virus-Lucknow CLCuKoV-Lu [IN-Luc-Ct-Bea10]□(2736 nt)  
=====

Performing Scan: ghr-miR2950 vs GU385879.2  
=====

Forward: Score: 142.000000 Q:2 to 17 R:78 to 97 Align Len (15)  
(73.33%) (93.33%)

Query: 3' auaagGUGGGGGACGUGUGGu 5'  
          |:|:| | | | | | |:  
Ref: 5' aataaCGCTCCC-GCACACTa 3'  
  
Energy: -27.389999 kCal/Mol

Scores for this hit:  
>ghr-miR2950 GU385879.2 142.00 -27.39 2 17 78 97 15  
73.33% 93.33%

Score for this Scan:  
Seq1,Seq2,Tot Score,Tot Energy,Max Score,Max  
Energy,Strand,Len1,Len2,Positions  
>>ghr-miR2950 GU385879.2 142.00 -27.39 142.00 -27.39  
38 21 2736 78  
Complete

Read Sequence:ghr-miR3476-5p (21 nt)  
Read Sequence:GU385879.2 Cotton Leaf Curl Kokhran Virus-Lucknow CLCuKoV-Lu [IN-Luc-Ct-Bea10]□(2736 nt)  
=====

Performing Scan: ghr-miR3476-5p vs GU385879.2

=====

Score for this Scan:  
No Hits Found above Threshold  
Complete

Read Sequence:ghr-miR7484a (24 nt)  
Read Sequence:GU385879.2 Cotton Leaf Curl Kokhran Virus-Lucknow CLCuKoV-Lu [IN-Luc-Ct-Bea10]□(2736 nt)

=====

Performing Scan: ghr-miR7484a vs GU385879.2

=====

Score for this Scan:  
No Hits Found above Threshold  
Complete

Read Sequence:ghr-miR7484b (24 nt)  
Read Sequence:GU385879.2 Cotton Leaf Curl Kokhran Virus-Lucknow CLCuKoV-Lu [IN-Luc-Ct-Bea10]□(2736 nt)

=====

Performing Scan: ghr-miR7484b vs GU385879.2

=====

Score for this Scan:  
No Hits Found above Threshold  
Complete

Read Sequence:ghr-miR7485 (24 nt)  
Read Sequence:GU385879.2 Cotton Leaf Curl Kokhran Virus-Lucknow CLCuKoV-Lu [IN-Luc-Ct-Bea10]□(2736 nt)

=====

Performing Scan: ghr-miR7485 vs GU385879.2

=====

Score for this Scan:  
No Hits Found above Threshold  
Complete

Read Sequence:ghr-miR7486a (24 nt)  
Read Sequence:GU385879.2 Cotton Leaf Curl Kokhran Virus-Lucknow CLCuKoV-Lu [IN-Luc-Ct-Bea10]□(2736 nt)

=====

Performing Scan: ghr-miR7486a vs GU385879.2

=====

Forward: Score: 171.000000 Q:2 to 22 R:2488 to 2510 Align Len (20)  
(75.00%) (90.00%)

Query: 3' aggUGCACCUGUUUCGCGAAGGAa 5'  
|: |||: ||||:|||||||  
Ref: 5' tgaATTTGGG-AAAGTGCTTCCTc 3'

Energy: -23.150000 kCal/Mol

Scores for this hit:

|               |            |        |        |   |    |      |      |    |
|---------------|------------|--------|--------|---|----|------|------|----|
| >ghr-miR7486a | GU385879.2 | 171.00 | -23.15 | 2 | 22 | 2488 | 2510 | 20 |
| 75.00%        | 90.00%     |        |        |   |    |      |      |    |

Forward: Score: 141.000000 Q:4 to 23 R:846 to 871 Align Len (21)  
(80.95%) (80.95%)

Query: 3' agGUG--CACCUGUUUCGCGAAGgaa 5'  
||| ||||| |||||

Ref: 5' gtCACCGGTGGACAATACGCTTCaaa 3'

Energy: -29.280001 kCal/Mol

Scores for this hit:

|               |            |        |        |              |    |
|---------------|------------|--------|--------|--------------|----|
| >ghr-miR7486a | GU385879.2 | 141.00 | -29.28 | 4 23 846 871 | 21 |
| 80.95%        | 80.95%     |        |        |              |    |

Score for this Scan:

Seq1,Seq2,Tot Score,Tot Energy,Max Score,Max

Energy,Strand,Len1,Len2,Positions

|                |               |        |        |        |        |
|----------------|---------------|--------|--------|--------|--------|
| >>ghr-miR7486a | GU385879.2    | 312.00 | -52.43 | 171.00 | -29.28 |
| 43 24          | 2736 2488 846 |        |        |        |        |

Complete

Read Sequence:ghr-miR7486b (24 nt)

Read Sequence:GU385879.2 Cotton Leaf Curl Kokhran Virus-Lucknow CLCuKoV-Lu [IN-Luc-Ct-Bea10] (2736 nt)

=====

Performing Scan: ghr-miR7486b vs GU385879.2

=====

Forward: Score: 171.000000 Q:2 to 22 R:2488 to 2510 Align Len (20)  
(75.00%) (90.00%)

Query: 3' aggUGCACCUGUUUCGCGAAGGAa 5'  
|: |||: ||||:|||||

Ref: 5' tgaATTTGGG-AAAGTGCTTCCTc 3'

Energy: -23.150000 kCal/Mol

Scores for this hit:

|               |            |        |        |                |    |
|---------------|------------|--------|--------|----------------|----|
| >ghr-miR7486b | GU385879.2 | 171.00 | -23.15 | 2 22 2488 2510 | 20 |
| 75.00%        | 90.00%     |        |        |                |    |

Forward: Score: 141.000000 Q:4 to 23 R:846 to 871 Align Len (21)  
(80.95%) (80.95%)

Query: 3' agGUG--CACCUGUUUCGCGAAGgaa 5'  
||| ||||| |||||

Ref: 5' gtCACCGGTGGACAATACGCTTCaaa 3'

Energy: -29.280001 kCal/Mol

Scores for this hit:

```
>ghr-miR7486b      GU385879.2 141.00      -29.28      4 23 846 871      21
      80.95%      80.95%
```

Score for this Scan:

Seq1,Seq2,Tot Score,Tot Energy,Max Score,Max  
Energy,Strand,Len1,Len2,Positions

```
>>ghr-miR7486b      GU385879.2 312.00      -52.43      171.00      -29.28
      44      24      2736      2488 846
```

Complete

Read Sequence:ghr-miR7487 (24 nt)

Read Sequence:GU385879.2 Cotton Leaf Curl Kokhran Virus-Lucknow CLCuKoV-  
Lu [IN-Luc-Ct-Bea10]□(2736 nt)

```
=====
Performing Scan: ghr-miR7487 vs GU385879.2
=====
```

Score for this Scan:

No Hits Found above Threshold

Complete

Read Sequence:ghr-miR7488 (21 nt)

Read Sequence:GU385879.2 Cotton Leaf Curl Kokhran Virus-Lucknow CLCuKoV-  
Lu [IN-Luc-Ct-Bea10]□(2736 nt)

```
=====
Performing Scan: ghr-miR7488 vs GU385879.2
=====
```

Score for this Scan:

No Hits Found above Threshold

Complete

Read Sequence:ghr-miR7489 (24 nt)

Read Sequence:GU385879.2 Cotton Leaf Curl Kokhran Virus-Lucknow CLCuKoV-  
Lu [IN-Luc-Ct-Bea10]□(2736 nt)

```
=====
Performing Scan: ghr-miR7489 vs GU385879.2
=====
```

Score for this Scan:

No Hits Found above Threshold

Complete

Read Sequence:ghr-miR7490 (24 nt)

Read Sequence:GU385879.2 Cotton Leaf Curl Kokhran Virus-Lucknow CLCuKoV-  
Lu [IN-Luc-Ct-Bea10]□(2736 nt)

```
=====
Performing Scan: ghr-miR7490 vs GU385879.2
=====
```

Score for this Scan:

No Hits Found above Threshold

Complete

Read Sequence:ghr-miR7491 (24 nt)

Read Sequence:GU385879.2 Cotton Leaf Curl Kokhran Virus-Lucknow CLCuKoV-  
Lu [IN-Luc-Ct-Bea10]□(2736 nt)

```
=====
```

Performing Scan: ghr-miR7491 vs GU385879.2

=====

Score for this Scan:

No Hits Found above Threshold

Complete

Read Sequence:ghr-miR7492a (23 nt)

Read Sequence:GU385879.2 Cotton Leaf Curl Kokhran Virus-Lucknow CLCuKoV-Lu [IN-Luc-Ct-Bea10]□(2736 nt)

=====

Performing Scan: ghr-miR7492a vs GU385879.2

=====

Score for this Scan:

No Hits Found above Threshold

Complete

Read Sequence:ghr-miR7492b (23 nt)

Read Sequence:GU385879.2 Cotton Leaf Curl Kokhran Virus-Lucknow CLCuKoV-Lu [IN-Luc-Ct-Bea10]□(2736 nt)

=====

Performing Scan: ghr-miR7492b vs GU385879.2

=====

Score for this Scan:

No Hits Found above Threshold

Complete

Read Sequence:ghr-miR7492c (23 nt)

Read Sequence:GU385879.2 Cotton Leaf Curl Kokhran Virus-Lucknow CLCuKoV-Lu [IN-Luc-Ct-Bea10]□(2736 nt)

=====

Performing Scan: ghr-miR7492c vs GU385879.2

=====

Score for this Scan:

No Hits Found above Threshold

Complete

Read Sequence:ghr-miR7493 (24 nt)

Read Sequence:GU385879.2 Cotton Leaf Curl Kokhran Virus-Lucknow CLCuKoV-Lu [IN-Luc-Ct-Bea10]□(2736 nt)

=====

Performing Scan: ghr-miR7493 vs GU385879.2

=====

Score for this Scan:

No Hits Found above Threshold

Complete

Read Sequence:ghr-miR7494 (23 nt)

Read Sequence:GU385879.2 Cotton Leaf Curl Kokhran Virus-Lucknow CLCuKoV-Lu [IN-Luc-Ct-Bea10]□(2736 nt)

=====

Performing Scan: ghr-miR7494 vs GU385879.2

=====

Score for this Scan:

No Hits Found above Threshold

Complete

Read Sequence:ghr-miR7495a (21 nt)  
Read Sequence:GU385879.2 Cotton Leaf Curl Kokhran Virus-Lucknow CLCuKoV-Lu [IN-Luc-Ct-Bea10]□(2736 nt)  
=====

Performing Scan: ghr-miR7495a vs GU385879.2  
=====

Score for this Scan:  
No Hits Found above Threshold  
Complete

Read Sequence:ghr-miR7495b (21 nt)  
Read Sequence:GU385879.2 Cotton Leaf Curl Kokhran Virus-Lucknow CLCuKoV-Lu [IN-Luc-Ct-Bea10]□(2736 nt)  
=====

Performing Scan: ghr-miR7495b vs GU385879.2  
=====

Score for this Scan:  
No Hits Found above Threshold  
Complete

Read Sequence:ghr-miR7496a (24 nt)  
Read Sequence:GU385879.2 Cotton Leaf Curl Kokhran Virus-Lucknow CLCuKoV-Lu [IN-Luc-Ct-Bea10]□(2736 nt)  
=====

Performing Scan: ghr-miR7496a vs GU385879.2  
=====

Score for this Scan:  
No Hits Found above Threshold  
Complete

Read Sequence:ghr-miR7496b (24 nt)  
Read Sequence:GU385879.2 Cotton Leaf Curl Kokhran Virus-Lucknow CLCuKoV-Lu [IN-Luc-Ct-Bea10]□(2736 nt)  
=====

Performing Scan: ghr-miR7496b vs GU385879.2  
=====

Score for this Scan:  
No Hits Found above Threshold  
Complete

Read Sequence:ghr-miR7497 (23 nt)  
Read Sequence:GU385879.2 Cotton Leaf Curl Kokhran Virus-Lucknow CLCuKoV-Lu [IN-Luc-Ct-Bea10]□(2736 nt)  
=====

Performing Scan: ghr-miR7497 vs GU385879.2  
=====

Forward: Score: 148.000000 Q:2 to 22 R:349 to 373 Align Len (22)  
(68.18%) (77.27%)

Query: 3' uuGGGU--AUACUGUCAGGUGUACa 5'  
|:| | | | | | | | | |

Ref: 5' gtCTCAACTTCGACAGCCCATATGt 3'

Energy: -22.590000 kCal/Mol

Scores for this hit:

|              |            |        |        |   |    |     |     |    |
|--------------|------------|--------|--------|---|----|-----|-----|----|
| >ghr-miR7497 | GU385879.2 | 148.00 | -22.59 | 2 | 22 | 349 | 373 | 22 |
| 68.18%       | 77.27%     |        |        |   |    |     |     |    |

Score for this Scan:

Seq1,Seq2,Tot Score,Tot Energy,Max Score,Max  
Energy,Strand,Len1,Len2,Positions

|               |            |        |        |        |        |
|---------------|------------|--------|--------|--------|--------|
| >>ghr-miR7497 | GU385879.2 | 148.00 | -22.59 | 148.00 | -22.59 |
| 59            | 23         | 2736   | 349    |        |        |

Complete

Read Sequence:ghr-miR7498 (24 nt)

Read Sequence:GU385879.2 Cotton Leaf Curl Kokhran Virus-Lucknow CLCuKoV-Lu [IN-Luc-Ct-Bea10]□(2736 nt)

=====

Performing Scan: ghr-miR7498 vs GU385879.2

=====

Score for this Scan:

No Hits Found above Threshold

Complete

Read Sequence:ghr-miR7499 (24 nt)

Read Sequence:GU385879.2 Cotton Leaf Curl Kokhran Virus-Lucknow CLCuKoV-Lu [IN-Luc-Ct-Bea10]□(2736 nt)

=====

Performing Scan: ghr-miR7499 vs GU385879.2

=====

Score for this Scan:

No Hits Found above Threshold

Complete

Read Sequence:ghr-miR7500 (24 nt)

Read Sequence:GU385879.2 Cotton Leaf Curl Kokhran Virus-Lucknow CLCuKoV-Lu [IN-Luc-Ct-Bea10]□(2736 nt)

=====

Performing Scan: ghr-miR7500 vs GU385879.2

=====

Score for this Scan:

No Hits Found above Threshold

Complete

Read Sequence:ghr-miR7501 (24 nt)

Read Sequence:GU385879.2 Cotton Leaf Curl Kokhran Virus-Lucknow CLCuKoV-Lu [IN-Luc-Ct-Bea10]□(2736 nt)

=====

Performing Scan: ghr-miR7501 vs GU385879.2

=====

Score for this Scan:

No Hits Found above Threshold

Complete

Read Sequence:ghr-miR7502 (24 nt)  
Read Sequence:GU385879.2 Cotton Leaf Curl Kokhran Virus-Lucknow CLCuKoV-Lu [IN-Luc-Ct-Bea10]□(2736 nt)

Performing Scan: ghr-miR7502 vs GU385879.2

Score for this Scan:

No Hits Found above Threshold

Complete

Read Sequence:ghr-miR7503 (24 nt)

Read Sequence:GU385879.2 Cotton Leaf Curl Kokhran Virus-Lucknow CLCuKoV-Lu [IN-Luc-Ct-Bea10]□(2736 nt)

Performing Scan: ghr-miR7503 vs GU385879.2

Forward: Score: 161.000000 Q:2 to 18 R:2214 to 2237 Align Len (16)  
(81.25%) (81.25%)

Query: 3' agauugaACAAGUCGGUAGCUAGa 5'

|| || |||||

Ref: 5' ctcttgctGATCTTCCATCGATCt 3'

Energy: -23.350000 kCal/Mol

Scores for this hit:

|              |            |        |        |   |    |      |      |    |
|--------------|------------|--------|--------|---|----|------|------|----|
| >ghr-miR7503 | GU385879.2 | 161.00 | -23.35 | 2 | 18 | 2214 | 2237 | 16 |
|              | 81.25%     | 81.25% |        |   |    |      |      |    |

Score for this Scan:

Seq1,Seq2,Tot Score,Tot Energy,Max Score,Max

Energy,Strand,Len1,Len2,Positions

|               |            |        |        |        |        |
|---------------|------------|--------|--------|--------|--------|
| >>ghr-miR7503 | GU385879.2 | 161.00 | -23.35 | 161.00 | -23.35 |
| 65            | 24         | 2736   | 2214   |        |        |

Complete

Read Sequence:ghr-miR7504a (24 nt)

Read Sequence:GU385879.2 Cotton Leaf Curl Kokhran Virus-Lucknow CLCuKoV-Lu [IN-Luc-Ct-Bea10]□(2736 nt)

Performing Scan: ghr-miR7504a vs GU385879.2

Score for this Scan:

No Hits Found above Threshold

Complete

Read Sequence:ghr-miR7504b (24 nt)

Read Sequence:GU385879.2 Cotton Leaf Curl Kokhran Virus-Lucknow CLCuKoV-Lu [IN-Luc-Ct-Bea10]□(2736 nt)

Performing Scan: ghr-miR7504b vs GU385879.2



Score for this Scan:  
No Hits Found above Threshold  
Complete

Read Sequence:ghr-miR7505 (21 nt)  
Read Sequence:GU385879.2 Cotton Leaf Curl Kokhran Virus-Lucknow CLCuKoV-Lu [IN-Luc-Ct-Bea10]□(2736 nt)

Performing Scan: ghr-miR7505 vs GU385879.2

Score for this Scan:  
No Hits Found above Threshold  
Complete

Read Sequence:ghr-miR7506 (24 nt)  
Read Sequence:GU385879.2 Cotton Leaf Curl Kokhran Virus-Lucknow CLCuKoV-Lu [IN-Luc-Ct-Bea10]□(2736 nt)

Performing Scan: ghr-miR7506 vs GU385879.2

Forward: Score: 145.000000 Q:2 to 22 R:509 to 533 Align Len (22)  
(59.09%) (81.82%)

Query: 3' cacGGUU-GCGGUAC-AGGGUCUGUa 5'  
          :|: |:: || :|||||  
Ref: 5' ggtTCAGTCGTT-TGAGTCCAGACat 3'

Energy: -23.330000 kCal/Mol

Scores for this hit:  
>ghr-miR7506 GU385879.2 145.00 -23.33 2 22 509 533 22  
59.09% 81.82%

Score for this Scan:  
Seq1,Seq2,Tot Score,Tot Energy,Max Score,Max  
Energy,Strand,Len1,Len2,Positions  
>>ghr-miR7506 GU385879.2 145.00 -23.33 145.00 -23.33  
69 24 2736 509  
Complete

Read Sequence:ghr-miR7507 (24 nt)  
Read Sequence:GU385879.2 Cotton Leaf Curl Kokhran Virus-Lucknow CLCuKoV-Lu [IN-Luc-Ct-Bea10]□(2736 nt)

Performing Scan: ghr-miR7507 vs GU385879.2

Score for this Scan:  
No Hits Found above Threshold  
Complete

Read Sequence:ghr-miR7508 (21 nt)  
Read Sequence:GU385879.2 Cotton Leaf Curl Kokhran Virus-Lucknow CLCuKoV-Lu [IN-Luc-Ct-Bea10]□(2736 nt)

=====

Performing Scan: ghr-miR7508 vs GU385879.2

=====

Score for this Scan:  
No Hits Found above Threshold  
Complete

Read Sequence:ghr-miR7509 (24 nt)  
Read Sequence:GU385879.2 Cotton Leaf Curl Kokhran Virus-Lucknow CLCuKoV-Lu [IN-Luc-Ct-Bea10]□(2736 nt)

=====

Performing Scan: ghr-miR7509 vs GU385879.2

=====

Score for this Scan:  
No Hits Found above Threshold  
Complete

Read Sequence:ghr-miR7510a (24 nt)  
Read Sequence:GU385879.2 Cotton Leaf Curl Kokhran Virus-Lucknow CLCuKoV-Lu [IN-Luc-Ct-Bea10]□(2736 nt)

=====

Performing Scan: ghr-miR7510a vs GU385879.2

=====

Score for this Scan:  
No Hits Found above Threshold  
Complete

Read Sequence:ghr-miR7510b (23 nt)  
Read Sequence:GU385879.2 Cotton Leaf Curl Kokhran Virus-Lucknow CLCuKoV-Lu [IN-Luc-Ct-Bea10]□(2736 nt)

=====

Performing Scan: ghr-miR7510b vs GU385879.2

=====

Score for this Scan:  
No Hits Found above Threshold  
Complete

Read Sequence:ghr-miR7511 (24 nt)  
Read Sequence:GU385879.2 Cotton Leaf Curl Kokhran Virus-Lucknow CLCuKoV-Lu [IN-Luc-Ct-Bea10]□(2736 nt)

=====

Performing Scan: ghr-miR7511 vs GU385879.2

=====

Score for this Scan:  
No Hits Found above Threshold  
Complete

Read Sequence:ghr-miR7512 (21 nt)  
Read Sequence:GU385879.2 Cotton Leaf Curl Kokhran Virus-Lucknow CLCuKoV-Lu [IN-Luc-Ct-Bea10]□(2736 nt)

=====

Performing Scan: ghr-miR7512 vs GU385879.2

=====

Score for this Scan:

No Hits Found above Threshold  
Complete

Read Sequence:ghr-miR7513 (21 nt)

Read Sequence:GU385879.2 Cotton Leaf Curl Kokhran Virus-Lucknow CLCuKoV-Lu [IN-Luc-Ct-Bea10] (2736 nt)

=====

Performing Scan: ghr-miR7513 vs GU385879.2

=====

Forward: Score: 162.000000 Q:2 to 20 R:1350 to 1372 Align Len (20)  
(70.00%) (85.00%)

Query: 3' agUUUGCUAA--GGACCGACUAa 5'

::|||:|| | |||||

Ref: 5' atGGACGGTTGACGTGGCTGATg 3'

Energy: -21.459999 kCal/Mol

Scores for this hit:

|              |            |        |        |   |    |      |      |    |
|--------------|------------|--------|--------|---|----|------|------|----|
| >ghr-miR7513 | GU385879.2 | 162.00 | -21.46 | 2 | 20 | 1350 | 1372 | 20 |
|              | 70.00%     | 85.00% |        |   |    |      |      |    |

Score for this Scan:

Seq1,Seq2,Tot Score,Tot Energy,Max Score,Max

Energy,Strand,Len1,Len2,Positions

|               |            |        |        |        |        |  |  |  |
|---------------|------------|--------|--------|--------|--------|--|--|--|
| >>ghr-miR7513 | GU385879.2 | 162.00 | -21.46 | 162.00 | -21.46 |  |  |  |
|               | 77         | 21     | 2736   | 1350   |        |  |  |  |

Complete

Read Sequence:ghr-miR7514 (24 nt)

Read Sequence:GU385879.2 Cotton Leaf Curl Kokhran Virus-Lucknow CLCuKoV-Lu [IN-Luc-Ct-Bea10] (2736 nt)

=====

Performing Scan: ghr-miR7514 vs GU385879.2

=====

Score for this Scan:

No Hits Found above Threshold

Complete

Scan Complete

## RNA22 v2 results

Results have been computed and are shown below. If there are no results shown, it means your chosen

parameters yielded no results.

Note: The p-value represents the likelihood that the target site loci is random. That is, a lower

p-value represents a greater chance that the loci contains a valid MRE

```
ghr_miR2950      GU385879.2 Cotton leaf curl Kokhran virus_Lucknow      target
from/to=[78,97] -23.70 AATAACGCTCCCGCACACTA  TGGTGTGCAGGGGGTGAATA
      .(((.((((((((((((((((((( ))) )))))))..))))). 17      20      0.223000
ghr_miR169a      GU385879.2 Cotton leaf curl Kokhran virus_Lucknow      target
from/to=[691,711] -16.70 GTGTGATGTTTTCTTGTTA  TAGCCAAGGATGACTTGCGTG
      .....(((.(((((((((((. ))) )))))))..))))..... 12      21      0.156000
ghr_miR393       GU385879.2 Cotton leaf curl Kokhran virus_Lucknow      target
from/to=[1735,1758] -16.10 TATTTGATTGCCAGTCCTTTTGGG
      TCCAAAGGGATCGCATTGATCT ...((.(((.(((.(((((((((((
      ))))))) ))))..)).. 16      24      0.203000
ghr_miR390a      GU385879.2 Cotton leaf curl Kokhran virus_Lucknow      target
from/to=[2281,2298] -18.00 GGCCTGACATCTGAGCTT  AAGCTCAGGAGGGATAGCGCC
      ((((((.(((.((((((((((( ))) )))))))..))..))..)) 15      18      0.148000
ghr_miR390b      GU385879.2 Cotton leaf curl Kokhran virus_Lucknow      target
from/to=[2281,2298] -18.00 GGCCTGACATCTGAGCTT  AAGCTCAGGAGGGATAGCGCC
      ((((((.(((.((((((((((( ))) )))))))..))..))..)) 15      18      0.148000
ghr_miR390c      GU385879.2 Cotton leaf curl Kokhran virus_Lucknow      target
from/to=[2281,2298] -18.00 GGCCTGACATCTGAGCTT  AAGCTCAGGAGGGATAGCGCC
      ((((((.(((.((((((((((( ))) )))))))..))..))..)) 15      18      0.148000
ghr_miR7486a     GU385879.2 Cotton leaf curl Kokhran virus_Lucknow      target
from/to=[2488,2510] -21.30 TGAATTTGGGAAAGTGCTTCCTC
      AAGGAAGCGCTTTGTCCACGTGGA .....(((.(((((((((((((((
      ))))))) ))))..))..... 16      23      0.007520
ghr_miR7486b     GU385879.2 Cotton leaf curl Kokhran virus_Lucknow      target
from/to=[2489,2510] -21.30 GAATTTGGGAAAGTGCTTCCTC AAGGAAGCGCTTTGTCCACGTGG
      .....(((.(((((((((((((((. ))) ))))))) ))))..... 16      22
      0.007520
ghr_miR7512      GU385879.2 Cotton leaf curl Kokhran virus_Lucknow      target
from/to=[917,938] -16.70 TGTGTATAACCAGCAGGAAGCT TGCTACTTGTAGTTATGCATG
      .(((((((((((.(((.((((((((((( ))) )))))))..))))). 17      22      0.188000
ghr_miR7513      GU385879.2 Cotton leaf curl Kokhran virus_Lucknow      target
from/to=[1350,1372] -17.50 ATGGACGGTTGACGTGGCTGATG
      AATCAGCCAGGAATCGTTTGA ....(((.(((.(((.(((((((((((
      ))))))) ))))..))..... 15      23      0.319000
ghr_miR7489      GU385879.2 Cotton leaf curl Kokhran virus_Lucknow      target
from/to=[1408,1430] -16.50 GCGACATCCTGCAAGGCTGCAAA
      ATTGTTGCCAATACAGGAGAACGT (((.(((.(((.(((.(((.
      ))))..))..))..)).. 15      23      0.355000
```

Prediction by psRNATarget

#Please import the downloaded file into Microsoft Excel or other spreadsheet software

| miRNA_Acc.     | Target_Acc. | Expectation | UPE\$ | miRNA_start | miRNA_end | Target_start | Target_end | miRNA_aligned_fragment   | alignment              | Target_aligned_fragment  | Inhibition  | Target_Desc.                           | Multiplicity |
|----------------|-------------|-------------|-------|-------------|-----------|--------------|------------|--------------------------|------------------------|--------------------------|-------------|----------------------------------------|--------------|
| ghr-miR7484a   | GU385879.2  | 5.0         | -1.0  | 1           | 24        | 2680         | 2703       | UUUGUAUUAUAGAUCAAAGAGCAA | :::: ::::: :: ::::     | AAAAACUUUAAUUUGAAAUUCAAA | Cleavage    | Cotton leaf curl Kokhran               | 2            |
| virus-Lucknow  |             |             |       |             |           |              |            |                          |                        |                          |             |                                        |              |
| ghr-miR7484b   | GU385879.2  | 5.0         | -1.0  | 1           | 24        | 2680         | 2703       | UUUGUAUUAUAGAUCAAAGAGCAA | :::: ::::: :: ::::     | AAAAACUUUAAUUUGAAAUUCAAA | Cleavage    | Cotton leaf curl Kokhran               | 2            |
| virus-Lucknow  |             |             |       |             |           |              |            |                          |                        |                          |             |                                        |              |
| ghr-miR7486a   | GU385879.2  | 5.0         | -1.0  | 1           | 24        | 2488         | 2510       | AAGGAAGCGCUUUGUCCACGUGGA | :: ::::: ::::: :::::   | UGAAUUUGGG-AAAGUCUUCUC   | Cleavage    | Cotton leaf curl Kokhran               | 1            |
| virus-Lucknow  |             |             |       |             |           |              |            |                          |                        |                          |             |                                        |              |
| ghr-miR7486b   | GU385879.2  | 5.0         | -1.0  | 1           | 24        | 2488         | 2510       | AAGGAAGCGCUUUGUCCACGUGGA | :: ::::: ::::: :::::   | UGAAUUUGGG-AAAGUCUUCUC   | Cleavage    | Cotton leaf curl Kokhran               | 1            |
| virus-Lucknow  |             |             |       |             |           |              |            |                          |                        |                          |             |                                        |              |
| ghr-miR7492a   | GU385879.2  | 5.5         | -1.0  | 1           | 23        | 901          | 923        | CUAUAGAACAUGAUCUUUAGCGG  | :::: ::::: ::::: ::::: | GGGUUAAUAAUUAUGUUGUGUAU  | Cleavage    | Cotton leaf curl Kokhran               | 2            |
| virus-Lucknow  |             |             |       |             |           |              |            |                          |                        |                          |             |                                        |              |
| ghr-miR7492b   | GU385879.2  | 5.5         | -1.0  | 1           | 23        | 901          | 923        | CUAUAGAACAUGAUCUUUAGCGG  | :::: ::::: ::::: ::::: | GGGUUAAUAAUUAUGUUGUGUAU  | Cleavage    | Cotton leaf curl Kokhran               | 2            |
| virus-Lucknow  |             |             |       |             |           |              |            |                          |                        |                          |             |                                        |              |
| ghr-miR7492c   | GU385879.2  | 5.5         | -1.0  | 1           | 23        | 901          | 923        | CUAUAGAACAUGAUCUUUAGCGG  | :::: ::::: ::::: ::::: | GGGUUAAUAAUUAUGUUGUGUAU  | Cleavage    | Cotton leaf curl Kokhran               | 2            |
| virus-Lucknow  |             |             |       |             |           |              |            |                          |                        |                          |             |                                        |              |
| ghr-miR7510b   | GU385879.2  | 5.5         | -1.0  | 1           | 23        | 1581         | 1603       | AAGAACAUGAUCUUUAGCGGCGU  | :: ::::: ::::: :::::   | AGAGUGAUGAAGAUCGCAUUCUU  | Cleavage    | Cotton leaf curl Kokhran               | 2            |
| virus-Lucknow  |             |             |       |             |           |              |            |                          |                        |                          |             |                                        |              |
| ghr-miR2949b   | GU385879.2  | 6.0         | -1.0  | 1           | 22        | 853          | 874        | UCUUUUGAACUGGAUUUGCCGA   | :: ::::: ::::: :::::   | GUGGACAAUACGCUUCAAGGA    | Translation | Cotton leaf curl Kokhran virus-Lucknow | 1            |
| ghr-miR2949c   | GU385879.2  | 6.0         | -1.0  | 1           | 22        | 853          | 874        | UCUUUUGAACUGGAUUUGCCGA   | :: ::::: ::::: :::::   | GUGGACAAUACGCUUCAAGGA    | Translation | Cotton leaf curl Kokhran virus-Lucknow | 1            |
| ghr-miR3476-5p | GU385879.2  | 6.0         | -1.0  | 1           | 21        | 765          | 785        | UGAACUGGGUUUGUUGGCUGC    | : ::::: ::::: :::::    | UUUGAUAAUGAGCCCAGUACG    | Cleavage    | Cotton leaf curl Kokhran virus-Lucknow | 1            |
| ghr-miR396a    | GU385879.2  | 6.0         | -1.0  | 1           | 21        | 1250         | 1270       | UUCACAGCUUUCUUGAACUG     | :: ::::: ::::: :::::   | CAGAUUCGGAAAGCUAUGAAA    | Cleavage    | Cotton leaf curl Kokhran virus-Lucknow | 1            |

|                 |                           |                  |                       |                       |                           |                       |                       |             |
|-----------------|---------------------------|------------------|-----------------------|-----------------------|---------------------------|-----------------------|-----------------------|-------------|
| ghr-miR396b     | GU385879.2                | 6.0              | -1.0                  | 1                     | 21                        | 1250                  | 1270                  |             |
|                 | UUCCACAGCUUUCUUGAACUG     |                  | :: :                  | .....                 | :: :                      | CAGAUUCGGAAGCUAUGAAA  |                       |             |
|                 | Cleavage                  | Cotton leaf curl | Kokhran virus-Lucknow | 1                     |                           |                       |                       |             |
| ghr-miR7497     | GU385879.2                | 6.0              | -1.0                  | 1                     | 23                        | 155                   | 176                   |             |
|                 | ACAUGUGGACUGUCAUAUGGGUU   |                  | ::: ::                | .....                 | ::                        | UUCCCCUAU-            |                       |             |
|                 | ACGGUUCACGGGU             | Cleavage         | Cotton leaf curl      | Kokhran virus-Lucknow | 2                         |                       |                       |             |
| ghr-miR7500     | GU385879.2                | 6.0              | -1.0                  | 1                     | 24                        | 674                   | 697                   |             |
|                 | AUCGAGUUAUUCGAGUUAUUCGAG  |                  | :: : ::               | .....                 | ....                      |                       |                       |             |
|                 | GAAGAAUCACACGAAUAGUGUGAU  | Cleavage         | Cotton leaf curl      | Kokhran               |                           |                       |                       |             |
|                 | virus-Lucknow             | 1                |                       |                       |                           |                       |                       |             |
| ghr-miR7503     | GU385879.2                | 6.0              | -1.0                  | 1                     | 24                        | 2215                  | 2237                  |             |
|                 | AGAUCGAUGGCUGAACAAAGUUAGA |                  | ::: ::                | :                     | .....                     | UCUUGCU-              |                       |             |
|                 | GAUCUCCAUCGAUCU           | Translation      | Cotton leaf curl      | Kokhran virus-Lucknow | 1                         |                       |                       |             |
| ghr-miR7505     | GU385879.2                | 6.0              | -1.0                  | 1                     | 21                        | 2049                  | 2069                  |             |
|                 | UUCAGAAACCAUCCCUUCCUU     |                  | .....                 | .....                 | :                         | .....                 | AGGGAGCCGGUGGCUCUGGAA |             |
|                 | Cleavage                  | Cotton leaf curl | Kokhran virus-Lucknow | 1                     |                           |                       |                       |             |
| ghr-miR7513     | GU385879.2                | 6.0              | -1.0                  | 1                     | 21                        | 2540                  | 2560                  |             |
|                 | AAUCAGCCAGGAAUCGUUUGA     | :                | .....                 | .....                 | :                         | UGAAAUAGUUUUUGGCUUGUA |                       |             |
|                 | Cleavage                  | Cotton leaf curl | Kokhran virus-Lucknow | 1                     |                           |                       |                       |             |
| ghr-miR827a     | GU385879.2                | 6.0              | -1.0                  | 1                     | 21                        | 740                   | 760                   |             |
|                 | UUAGAUGACCAUCAACAAACA     | :                | :: :                  | .....                 | .....                     | AGAUUUUGGAUGGGUGUUUAA |                       |             |
|                 | Cleavage                  | Cotton leaf curl | Kokhran virus-Lucknow | 1                     |                           |                       |                       |             |
| ghr-miR827b     | GU385879.2                | 6.0              | -1.0                  | 1                     | 21                        | 740                   | 760                   |             |
|                 | UUAGAUGACCAUCAACAAACA     | :                | :: :                  | .....                 | .....                     | AGAUUUUGGAUGGGUGUUUAA |                       |             |
|                 | Cleavage                  | Cotton leaf curl | Kokhran virus-Lucknow | 1                     |                           |                       |                       |             |
| ghr-miR827c     | GU385879.2                | 6.0              | -1.0                  | 1                     | 21                        | 740                   | 760                   |             |
|                 | UUAGAUGACCAUCAACAAACA     | :                | :: :                  | .....                 | .....                     | AGAUUUUGGAUGGGUGUUUAA |                       |             |
|                 | Cleavage                  | Cotton leaf curl | Kokhran virus-Lucknow | 1                     |                           |                       |                       |             |
| ghr-miR2949a-5p | GU385879.2                | 6.5              | -1.0                  | 1                     | 22                        | 319                   | 340                   |             |
|                 | ACUUUUGAACUGGAUUUGCCGA    |                  | :: . ::               | .....                 |                           |                       |                       |             |
|                 | UUUCCACGCCCGCUUCGAAGGU    | Translation      | Cotton leaf curl      | Kokhran virus-        |                           |                       |                       |             |
|                 | Lucknow                   | 1                |                       |                       |                           |                       |                       |             |
| ghr-miR2950     | GU385879.2                | 6.5              | -1.0                  | 1                     | 21                        | 78                    | 97                    |             |
|                 | UGGUGUGCAGGGGGUGGAAUA     | ::               | .....                 | .....                 | .....                     | AAUACGCUCCC-GCACACUA  |                       |             |
|                 | Cleavage                  | Cotton leaf curl | Kokhran virus-Lucknow | 1                     |                           |                       |                       |             |
| ghr-miR7484a    | GU385879.2                | 6.5              | -1.0                  | 1                     | 24                        | 1081                  | 1105                  | UUUGUAUUAU- |
|                 | UAGAUCAAAGAGCAA           | .....            | .....                 | .....                 | AAGAUGAUUGGUCUACAUAUACAAC |                       |                       |             |
|                 | Cleavage                  | Cotton leaf curl | Kokhran virus-Lucknow | 2                     |                           |                       |                       |             |
| ghr-miR7484b    | GU385879.2                | 6.5              | -1.0                  | 1                     | 24                        | 1081                  | 1105                  | UUUGUAUUAU- |
|                 | UAGAUCAAAGAGCAA           | .....            | .....                 | .....                 | AAGAUGAUUGGUCUACAUAUACAAC |                       |                       |             |
|                 | Cleavage                  | Cotton leaf curl | Kokhran virus-Lucknow | 2                     |                           |                       |                       |             |
| ghr-miR7492a    | GU385879.2                | 6.5              | -1.0                  | 1                     | 23                        | 1094                  | 1116                  |             |
|                 | CUAUAGAACAUGAUCUUUAGCGG   |                  | :: : :                | .....                 | .....                     |                       |                       |             |
|                 | UACAUAUACAACAUGCUCUGUAA   | Cleavage         | Cotton leaf curl      | Kokhran               |                           |                       |                       |             |
|                 | virus-Lucknow             | 2                |                       |                       |                           |                       |                       |             |
| ghr-miR7492b    | GU385879.2                | 6.5              | -1.0                  | 1                     | 23                        | 1094                  | 1116                  |             |
|                 | CUAUAGAACAUGAUCUUUAGCGG   |                  | :: : :                | .....                 | .....                     |                       |                       |             |
|                 | UACAUAUACAACAUGCUCUGUAA   | Cleavage         | Cotton leaf curl      | Kokhran               |                           |                       |                       |             |
|                 | virus-Lucknow             | 2                |                       |                       |                           |                       |                       |             |
| ghr-miR7492c    | GU385879.2                | 6.5              | -1.0                  | 1                     | 23                        | 1094                  | 1116                  |             |
|                 | CUAUAGAACAUGAUCUUUAGCGG   |                  | :: : :                | .....                 | .....                     |                       |                       |             |
|                 | UACAUAUACAACAUGCUCUGUAA   | Cleavage         | Cotton leaf curl      | Kokhran               |                           |                       |                       |             |
|                 | virus-Lucknow             | 2                |                       |                       |                           |                       |                       |             |

|               |                          |     |      |   |             |      |                  |         |
|---------------|--------------------------|-----|------|---|-------------|------|------------------|---------|
| ghr-miR7497   | GU385879.2               | 6.5 | -1.0 | 1 | 23          | 459  | 481              |         |
|               | ACAUGUGGACUGUCAUAUGGGUU  |     |      |   | ....        | .    | .....            | ....    |
|               | AGGAUGUACAGAAGUCCAGAUGU  |     |      |   | Cleavage    |      | Cotton leaf curl | Kokhran |
| virus-Lucknow | 2                        |     |      |   |             |      |                  |         |
| ghr-miR7504b  | GU385879.2               | 6.5 | -1.0 | 1 | 24          | 1615 | 1638             |         |
|               | AGGAGGAAAAAUCUGAUUUGUCAU |     |      |   | ...         | .... | ::               | .....   |
|               | UUUUUAGUGCAGAAUUCUUCUCUU |     |      |   | Translation |      | Cotton leaf curl | Kokhran |
| virus-Lucknow | 1                        |     |      |   |             |      |                  |         |
| ghr-miR7510b  | GU385879.2               | 6.5 | -1.0 | 1 | 23          | 805  | 827              |         |
|               | AAGAACAUGAUCUUUAGCGGCGU  |     |      |   | ..          | .... | ....             | .....   |
|               | AUCGUGAUAGGUAUCAAGUUCUG  |     |      |   | Cleavage    |      | Cotton leaf curl | Kokhran |
| virus-Lucknow | 2                        |     |      |   |             |      |                  |         |

RNAhybrid  
Individual hits

---

dataset: 1  
target: GU385879.2  
length: 2736  
miRNA : ghr-miR156a  
length: 20  
  
mfe: -21.7 kcal/mol  
p-value: 1.000000e+00

position 2500  
target 5' A C AG A 3'  
GUGCUU CUCUUU UG  
CACGAG GAGAGA AC  
miRNA 3' U AG AGU 5'

---

dataset: 1  
target: GU385879.2  
length: 2736  
miRNA : ghr-miR156b  
length: 20  
  
mfe: -21.7 kcal/mol  
p-value: 1.000000e+00

position 2500  
target 5' A C AG A 3'  
GUGCUU CUCUUU UG  
CACGAG GAGAGA AC  
miRNA 3' U AG AGU 5'

---

dataset: 1  
target: GU385879.2  
length: 2736  
miRNA : ghr-miR156c  
length: 20  
  
mfe: -23.5 kcal/mol  
p-value: 1.000000e+00

position 2500  
target 5' A C AG G 3'  
GUGCUU CUCUUU UGA  
CACGAG GAGAGA ACU  
miRNA 3' U AG GU 5'

---

dataset: 1  
target: GU385879.2



length: 2736  
miRNA : ghr-miR156d  
length: 20

mfe: -21.7 kcal/mol  
p-value: 1.000000e+00

position 2500  
target 5' A C AG A 3'  
GUGCUU CUCUUU UG  
CACGAG GAGAGA AC  
miRNA 3' U AG AGU 5'

---

dataset: 1  
target: GU385879.2  
length: 2736  
miRNA : ghr-miR160  
length: 21

mfe: -25.0 kcal/mol  
p-value: 1.000000e+00

position 2044  
target 5' A G GGA CG G A 3'  
AUUAU GC GUGGCUCCU A  
UAUGU CG UACCGAGGA U  
miRNA 3' A G AU 5'

---

dataset: 1  
target: GU385879.2  
length: 2736  
miRNA : ghr-miR162a  
length: 21

mfe: -22.3 kcal/mol  
p-value: 1.000000e+00

position 1665  
target 5' U UCCUUGAU A 3'  
UGGG UGCAGAGG  
ACCU ACGUCUCC  
miRNA 3' G AAAUAGCU 5'

---

dataset: 1  
target: GU385879.2  
length: 2736  
miRNA : ghr-miR164  
length: 21

mfe: -27.2 kcal/mol  
p-value: 1.000000e+00

position 375  
target 5' A G CCCC A G C 3'  
GC CGUGCU CUGC UU UCCG  
CG GCACGG GACG AA AGGU  
miRNA 3' A U G 5'

---

dataset: 1  
target: GU385879.2  
length: 2736  
miRNA : ghr-miR166b  
length: 21

mfe: -23.9 kcal/mol  
p-value: 1.000000e+00

position 2038  
target 5' A A AUAUAG GG C U A 3'  
GG GAA GGAGCC UGG UCC GA  
CC CUU CUUCGG ACC AGG CU  
miRNA 3' C A 5'

---

dataset: 1  
target: GU385879.2  
length: 2736  
miRNA : ghr-miR167a  
length: 21

mfe: -23.1 kcal/mol  
p-value: 1.000000e+00

position 1400  
target 5' C GACAUCUGCAA U A 3'  
AGAUUAUGC GGC GC  
UCUAGUACG CCG CG  
miRNA 3' A A U AAGU 5'

---

dataset: 1  
target: GU385879.2  
length: 2736  
miRNA : ghr-miR167b  
length: 21

mfe: -23.1 kcal/mol  
p-value: 1.000000e+00

position 1400  
target 5' C GACAUCUGCAA U A 3'  
AGAUUAUGC GGC GC  
UCUAGUACG CCG CG  
miRNA 3' A A U AAGU 5'

---

dataset: 1  
target: GU385879.2  
length: 2736  
miRNA : ghr-miR169a  
length: 21  
  
mfe: -25.0 kcal/mol  
p-value: 1.000000e+00

position 1820  
target 5' C                    UACUGUAUAC           G           C 3'  
          CAGGC    GUCAU                    CCUU GGCU  
          GUCCG    CAGUA                    GGAA CCGA  
miRNA 3'            UU                                    U 5'

---

dataset: 1  
target: GU385879.2  
length: 2736  
miRNA : ghr-miR169b  
length: 21  
  
mfe: -27.2 kcal/mol  
p-value: 1.000000e+00

position 2180  
target 5' G            UAAG           G G           U 3'  
          CGGCG           CGUC U GGCUG  
          GCCGU           GUAG A CCGAC  
miRNA 3' G            UUA           G A           5'

---

dataset: 1  
target: GU385879.2  
length: 2736  
miRNA : ghr-miR172  
length: 21  
  
mfe: -26.6 kcal/mol  
p-value: 1.000000e+00

position 2177  
target 5' G                    AAG           U           CUG           G 3'  
          CUGCGGCGU           CGUCG GGG           UCU  
          GACGUCGUA           GUAGU CCU           AGA  
miRNA 3'                                    A           5'

---

dataset: 1  
target: GU385879.2  
length: 2736

miRNA : ghr-miR390a  
length: 21

mfe: -26.8 kcal/mol  
p-value: 1.000000e+00

position 2196  
target 5' G UGUCU CUU G 3'  
GGC GCUGU CCUCCU GCU  
CCG CGAUA GGAGGA CGA  
miRNA 3' G CU A 5'

---

dataset: 1  
target: GU385879.2  
length: 2736  
miRNA : ghr-miR390b  
length: 21

mfe: -26.8 kcal/mol  
p-value: 1.000000e+00

position 2196  
target 5' G UGUCU CUU G 3'  
GGC GCUGU CCUCCU GCU  
CCG CGAUA GGAGGA CGA  
miRNA 3' G CU A 5'

---

dataset: 1  
target: GU385879.2  
length: 2736  
miRNA : ghr-miR390c  
length: 21

mfe: -26.8 kcal/mol  
p-value: 1.000000e+00

position 2196  
target 5' G UGUCU CUU G 3'  
GGC GCUGU CCUCCU GCU  
CCG CGAUA GGAGGA CGA  
miRNA 3' G CU A 5'

---

dataset: 1  
target: GU385879.2  
length: 2736  
miRNA : ghr-miR393  
length: 22

mfe: -23.2 kcal/mol  
p-value: 1.000000e+00



-----  
dataset: 1  
target: GU385879.2  
length: 2736  
miRNA : ghr-miR396b  
length: 21  
  
mfe: -22.5 kcal/mol  
p-value: 1.000000e+00

position 1226  
target 5' C C A U 3'  
CAGU GGAGGCUGUG GG  
GUCA CUUUCGACAC CU  
miRNA 3' AGUU U 5'

-----  
dataset: 1  
target: GU385879.2  
length: 2736  
miRNA : ghr-miR398  
length: 21  
  
mfe: -23.4 kcal/mol  
p-value: 1.000000e+00

position 2469  
target 5' C A UG U U 3'  
G GGGUG UUGA GGC  
C CCCAC GACU UUG  
miRNA 3' UU UG C UGU 5'

-----  
dataset: 1  
target: GU385879.2  
length: 2736  
miRNA : ghr-miR399a  
length: 21  
  
mfe: -21.9 kcal/mol  
p-value: 1.000000e+00

position 2633  
target 5' A UG UCAAUAUAUAGU A AA A 3'  
UCGG A GAUC CCA UGGC  
GGCC U UUAG GGU ACCG  
miRNA 3' UG A A C 5'

-----  
dataset: 1  
target: GU385879.2  
length: 2736  
miRNA : ghr-miR399b

length: 21

mfe: -21.9 kcal/mol  
p-value: 1.000000e+00

position 2633

```
target 5' A   UG UCAAUAUAUAGU   A   AA   A 3'
          UCGG A               GAUC CCA UGGC
          GGCC U               UUAG GGU ACCG
miRNA  3'      UG               A   A   C 5'
```

---

dataset: 1

target: GU385879.2  
length: 2736  
miRNA : ghr-miR399c  
length: 21

mfe: -24.3 kcal/mol  
p-value: 1.000000e+00

position 2616

```
target 5'      G      CC      U 3'
          CAACUCUCC  GGUA
          GUUGAGAGG  CCGU
miRNA  3' UUCCG      AAA      5'
```

---

dataset: 1

target: GU385879.2  
length: 2736  
miRNA : ghr-miR399d  
length: 21

mfe: -21.6 kcal/mol  
p-value: 1.000000e+00

position 2047

```
target 5' A      AG      GG      U 3'
          UAGGG      CC  UGGC
          GUCCC      GG  ACCG
miRNA  3'      GUUUAGA  AA      U 5'
```

---

dataset: 1

target: GU385879.2  
length: 2736  
miRNA : ghr-miR399e  
length: 21

mfe: -21.0 kcal/mol  
p-value: 1.000000e+00

position 2615

```
target 5'      U      C      CC      U 3'
           GCAA UCUC  GGUA
           CGUU AGAG  CCGU
miRNA  3' GCCC      U      AAA      5'
```

---

```
dataset: 1
target: GU385879.2
length: 2736
miRNA : ghr-miR479
length: 22
```

```
mfe: -24.6 kcal/mol
p-value: 1.000000e+00
```

```
position 371
target 5' U      UGCUGCU  CCCAU  C      U 3'
           GUGAGCCG      GCC      UGU CGCG
           UACUCGGC      UGG      AUA GUGC
miRNA  3' C      U      UU      5'
```

---

```
dataset: 1
target: GU385879.2
length: 2736
miRNA : ghr-miR482a
length: 22
```

```
mfe: -26.0 kcal/mol
p-value: 1.000000e+00
```

```
position 581
target 5' U      C      CUUACCCAUA      U      G 3'
           GGUA UGGG      GAGUGGG AAGA
           CCAU ACCC      CUCAUCC UUCU
miRNA  3'      UC      U      5'
```

---

```
dataset: 1
target: GU385879.2
length: 2736
miRNA : ghr-miR482b
length: 22
```

```
mfe: -30.5 kcal/mol
p-value: 1.000000e+00
```

```
position 581
target 5' U      C      CUUACCCAUA      G 3'
           GGUA UGGG      GAGUGGGUAAGA
           CCGU ACCC      CUCAUCCGUUCU
miRNA  3'      AC      5'
```

---



dataset: 1  
target: GU385879.2  
length: 2736  
miRNA : ghr-miR827a  
length: 21  
  
mfe: -21.0 kcal/mol  
p-value: 1.000000e+00

position 2473  
target 5' G G CUUGA G 3'  
GU UGUUGAUGG AUUUGG  
CA ACAACUACC UAGAUU  
miRNA 3' A A AG 5'

---

dataset: 1  
target: GU385879.2  
length: 2736  
miRNA : ghr-miR827b  
length: 21  
  
mfe: -21.0 kcal/mol  
p-value: 1.000000e+00

position 2473  
target 5' G G CUUGA G 3'  
GU UGUUGAUGG AUUUGG  
CA ACAACUACC UAGAUU  
miRNA 3' A A AG 5'

---

dataset: 1  
target: GU385879.2  
length: 2736  
miRNA : ghr-miR827c  
length: 21  
  
mfe: -21.0 kcal/mol  
p-value: 1.000000e+00

position 2473  
target 5' G G CUUGA G 3'  
GU UGUUGAUGG AUUUGG  
CA ACAACUACC UAGAUU  
miRNA 3' A A AG 5'

---

dataset: 1  
target: GU385879.2  
length: 2736  
miRNA : ghr-miR2948-5p  
length: 22

mfe: -29.4 kcal/mol  
p-value: 1.000000e+00

position 2611  
target 5' C A G 3'  
UCUUGC ACUCUCCC CG  
AGAACG UGAGAGGG GU  
miRNA 3' UA GGU U 5'

---

dataset: 1  
target: GU385879.2  
length: 2736  
miRNA : ghr-miR2949a-3p  
length: 21

mfe: -20.5 kcal/mol  
p-value: 1.000000e+00

position 1655  
target 5' A GA CCUUGA G 3'  
UAGCUU AUUGGGU UUGCA  
AUUGAA UGACCUA AACGU  
miRNA 3' AAC 5'

---

dataset: 1  
target: GU385879.2  
length: 2736  
miRNA : ghr-miR2949a-5p  
length: 22

mfe: -21.7 kcal/mol  
p-value: 1.000000e+00

position 1242  
target 5' A C A A 3'  
GGU AUCCAG UUCGGAA  
CCG UAGGUC AAGUUUU  
miRNA 3' AG UU CA 5'

---

dataset: 1  
target: GU385879.2  
length: 2736  
miRNA : ghr-miR2949b  
length: 22

mfe: -21.7 kcal/mol  
p-value: 1.000000e+00

position 1242  
target 5' A C A A 3'

```
          GGU  AUCCAG UUCGGAA
          CCG  UAGGUC AAGUUUU
miRNA  3' AG   UU               CU 5'
```

---

```
dataset: 1
target: GU385879.2
length: 2736
miRNA : ghr-miR2949c
length: 22
```

```
mfe: -21.7 kcal/mol
p-value: 1.000000e+00
```

```
position 1242
target 5'  A   C           A       A   3'
          GGU  AUCCAG UUCGGAA
          CCG  UAGGUC AAGUUUU
miRNA  3' AG   UU               CU 5'
```

---

```
dataset: 1
target: GU385879.2
length: 2736
miRNA : ghr-miR2950
length: 21
```

```
mfe: -30.2 kcal/mol
p-value: 1.000000e+00
```

```
position 82
target 5'      A               U 3'
          CGCUCCC GCACACUA
          GUGGGGG CGUGUGGU
miRNA  3' AUAAG           A       5'
```

---

```
dataset: 1
target: GU385879.2
length: 2736
miRNA : ghr-miR3476-3p
length: 21
```

```
mfe: -22.5 kcal/mol
p-value: 1.000000e+00
```

```
position 2470
target 5'  G  GG           A       U 3'
          AG  U   GUGUUG UGGCU
          UC  G   UACAAC ACCGA
miRNA  3' AA  UU AC           A       5'
```

---

dataset: 1  
target: GU385879.2  
length: 2736  
miRNA : ghr-miR3476-5p  
length: 21

mfe: -25.8 kcal/mol  
p-value: 1.000000e+00

position 421  
target 5' G G U AA G 3'  
GGC AACAGGCCCA G CA  
UCG UUGUUUGGGU C GU  
miRNA 3' CG G AA 5'

---

dataset: 1  
target: GU385879.2  
length: 2736  
miRNA : ghr-miR7484a  
length: 24

mfe: -20.9 kcal/mol  
p-value: 1.000000e+00

position 1077  
target 5' A AAGA GA C C 3'  
UUG U UUGGUCUA AUAUACAA  
AAC A AACUAGAU UAUAUGUU  
miRNA 3' G GA U 5'

---

dataset: 1  
target: GU385879.2  
length: 2736  
miRNA : ghr-miR7484b  
length: 24

mfe: -20.9 kcal/mol  
p-value: 1.000000e+00

position 1077  
target 5' A AAGA GA C C 3'  
UUG U UUGGUCUA AUAUACAA  
AAC A AACUAGAU UAUAUGUU  
miRNA 3' G GA U 5'

---

dataset: 1  
target: GU385879.2  
length: 2736  
miRNA : ghr-miR7485  
length: 24

mfe: -22.2 kcal/mol  
p-value: 1.000000e+00

position 1575  
target 5' C                    GAU                    CGCAU                    A 3'  
         CUUCGAGAGU           GAAGAU           UCUUU  
         GAGGUUCUUA           UUUCUA           AGAAA  
miRNA 3'                    AG                    C                    5'

---

dataset: 1  
target: GU385879.2  
length: 2736  
miRNA : ghr-miR7486a  
length: 24

mfe: -30.7 kcal/mol  
p-value: 1.000000e+00

position 849  
target 5' A                    UA                    A 3'  
         CCG GUGGACAA           CGCUUC  
         GGU CACCUGUU           GCGAAG  
miRNA 3' A                    G                    UC                    GAA 5'

---

dataset: 1  
target: GU385879.2  
length: 2736  
miRNA : ghr-miR7486b  
length: 24

mfe: -30.7 kcal/mol  
p-value: 1.000000e+00

position 849  
target 5' A                    UA                    A 3'  
         CCG GUGGACAA           CGCUUC  
         GGU CACCUGUU           GCGAAG  
miRNA 3' A                    G                    UC                    GAA 5'

---

dataset: 1  
target: GU385879.2  
length: 2736  
miRNA : ghr-miR7487  
length: 24

mfe: -23.6 kcal/mol  
p-value: 1.000000e+00

position 1566  
target 5'                    U                    G                    UC                    A 3'  
         AC AGU GUCCU           GAGAGUG

UG UCA CAGGA UUCUCAU  
miRNA 3' AAU U UA A 5'

---

dataset: 1  
target: GU385879.2  
length: 2736  
miRNA : ghr-miR7488  
length: 21

mfe: -24.2 kcal/mol  
p-value: 1.000000e+00

position 2258  
target 5' G GUCC UG U 3'  
UGUCCCC U UCGA  
ACAGGGG A AGUU  
miRNA 3' AAA AC UG UU 5'

---

dataset: 1  
target: GU385879.2  
length: 2736  
miRNA : ghr-miR7489  
length: 24

mfe: -24.6 kcal/mol  
p-value: 1.000000e+00

position 1447  
target 5' U GAA A GUG G 3'  
GCGU UCC UG UGGCAGUGAU  
UGCA AGG AC ACCGUUGUUA  
miRNA 3' AG AUA 5'

---

dataset: 1  
target: GU385879.2  
length: 2736  
miRNA : ghr-miR7490  
length: 24

mfe: -23.5 kcal/mol  
p-value: 1.000000e+00

position 562  
target 5' G UGUUACUCGU A U 3'  
UGUUAGUGA GGU CUGGGCU  
GCAGUCACU UCA GAUCUGA  
miRNA 3' UG AAA 5'

---

dataset: 1

target: GU385879.2  
length: 2736  
miRNA : ghr-miR7491  
length: 24

mfe: -28.7 kcal/mol  
p-value: 1.000000e+00

position 1743  
target 5' U                    CC        U 3'  
          GC CAGUCCUUUUGGG    CCCA  
          CG GUUAGGAGAGCUU    GGGU  
miRNA 3' C A                    CUA        5'

---

dataset: 1  
target: GU385879.2  
length: 2736  
miRNA : ghr-miR7492a  
length: 23

mfe: -23.9 kcal/mol  
p-value: 1.000000e+00

position 2566  
target 5' U        UU    GG        GA    A    3'  
          CCGCU   GGA   CAUGUU   CUA  
          GGCGA   UCU   GUACAA   GAU  
miRNA 3'        UU    A                    AUC 5'

---

dataset: 1  
target: GU385879.2  
length: 2736  
miRNA : ghr-miR7492b  
length: 23

mfe: -23.9 kcal/mol  
p-value: 1.000000e+00

position 2566  
target 5' U        UU    GG        GA    A    3'  
          CCGCU   GGA   CAUGUU   CUA  
          GGCGA   UCU   GUACAA   GAU  
miRNA 3'        UU    A                    AUC 5'

---

dataset: 1  
target: GU385879.2  
length: 2736  
miRNA : ghr-miR7492c  
length: 23

mfe: -23.9 kcal/mol

p-value: 1.000000e+00

position 2566

```
target 5' U      UU  GG      GA  A    3'
          CCGCU  GGA  CAUGUU  CUA
          GGCGA  UCU  GUACAA  GAU
miRNA  3'      UU  A              AUC 5'
```

-----

dataset: 1

target: GU385879.2

length: 2736

miRNA : ghr-miR7493

length: 24

mfe: -20.7 kcal/mol

p-value: 1.000000e+00

position 1352

```
target 5' G      CG  GCU      A    3'
          GACGGUUGA  UG      GAUG
          CUGCUAACU  AU      UUAU
miRNA  3' A      UA  AAUU      AA 5'
```

-----

dataset: 1

target: GU385879.2

length: 2736

miRNA : ghr-miR7494

length: 23

mfe: -21.6 kcal/mol

p-value: 1.000000e+00

position 1300

```
target 5' G      GAUU      A    UG  UCGUG  A 3'
          UUGU      GAACUGG  UCC  A      AGU
          AACA      UUUGAUC  AGG  U      UCG
miRNA  3'      AU              UG      A 5'
```

-----

dataset: 1

target: GU385879.2

length: 2736

miRNA : ghr-miR7495a

length: 21

mfe: -21.0 kcal/mol

p-value: 1.000000e+00

position 2276

```
target 5' A  U  CCU      C    3'
          UG  AGG  GACAUCUGAG
          AC  UCC  CUGUAGAUUU
```



miRNA 3' U U CAUU 5'

dataset: 1  
target: GU385879.2  
length: 2736  
miRNA : ghr-miR7495b  
length: 21

mfe: -21.0 kcal/mol  
p-value: 1.000000e+00

position 2276  
target 5' A U CCU C 3'  
UG AGG GACAUCUGAG  
AC UCC CUGUAGAUUU  
miRNA 3' U U CAUU 5'

dataset: 1  
target: GU385879.2  
length: 2736  
miRNA : ghr-miR7497  
length: 23

mfe: -28.4 kcal/mol  
p-value: 1.000000e+00

position 362  
target 5' C UG U 3'  
AGCCCAUAUG AG CCG  
UUGGGUAUAC UC GGU  
miRNA 3' UG A GUACA 5'

dataset: 1  
target: GU385879.2  
length: 2736  
miRNA : ghr-miR7498  
length: 24

mfe: -30.9 kcal/mol  
p-value: 1.000000e+00

position 370  
target 5' A CCGUGCU CCCAU CCGC A 3'  
UGUGAG GCUGCC UGU GUCACCA  
ACACUC UGAUGG ACA CAGUGGU  
miRNA 3' U A 5'

dataset: 1  
target: GU385879.2

length: 2736  
miRNA : ghr-miR7500  
length: 24

mfe: -24.9 kcal/mol  
p-value: 1.000000e+00

position 2467  
target 5' U GGG UG A 3'  
UCGA UG UUGA UGGCUUGA  
AGCU AU AGCU AUUGAGCU  
miRNA 3' G A UG U A 5'

---

dataset: 1  
target: GU385879.2  
length: 2736  
miRNA : ghr-miR7501  
length: 24

mfe: -24.8 kcal/mol  
p-value: 1.000000e+00

position 2428  
target 5' A AACUCUCUG U A 3'  
UUUCGUGU CAGAGUU GAUGU  
AAAGCACA GUCUUAG CUAUA  
miRNA 3' AAA U 5'

---

dataset: 1  
target: GU385879.2  
length: 2736  
miRNA : ghr-miR7503  
length: 24

mfe: -27.0 kcal/mol  
p-value: 1.000000e+00

position 2214  
target 5' C U GA UU G 3'  
UCU GCU UC CCAUCGAUCU  
AGA UGA AG GGUAGCUAGA  
miRNA 3' U ACA UC 5'

---

dataset: 1  
target: GU385879.2  
length: 2736  
miRNA : ghr-miR7504a  
length: 24

mfe: -21.5 kcal/mol  
p-value: 1.000000e+00

position 670  
target 5' A AA C 3'  
GACG GAAUCACA  
CUGC CUUAGUGU  
miRNA 3' UA AC CAAAGUAU 5'

-----  
dataset: 1  
target: GU385879.2  
length: 2736  
miRNA : ghr-miR7504b  
length: 24

mfe: -21.5 kcal/mol  
p-value: 1.000000e+00

position 1478  
target 5' G AACACGGUGAACA CUA C U G 3'  
AUGACGAU AGAU UU UC CUCCU  
UACUGUUUA UCUA AA AG GAGGA  
miRNA 3' G A 5'

-----  
dataset: 1  
target: GU385879.2  
length: 2736  
miRNA : ghr-miR7505  
length: 21

mfe: -24.7 kcal/mol  
p-value: 1.000000e+00

position 2036  
target 5' A GAAAUAU GCC GGCUC A 3'  
AAGGA AGGGA GGU CUGAA  
UCCCU UCCCU CCA GACUU  
miRNA 3' A AA 5'

-----  
dataset: 1  
target: GU385879.2  
length: 2736  
miRNA : ghr-miR7506  
length: 24

mfe: -30.3 kcal/mol  
p-value: 1.000000e+00

position 1795  
target 5' G CAAUGAC AAA C 3'  
GUCGACGUCAU GUU CCAGGCGU  
CGGUUGC GGUA CAG GGUCUGUA  
miRNA 3' CA 5'

-----  
dataset: 1  
target: GU385879.2  
length: 2736  
miRNA : ghr-miR7507  
length: 24  
  
mfe: -25.4 kcal/mol  
p-value: 1.000000e+00

position 364  
target 5' G UAUGUGA G C 3'  
          CCCA GCC UGCU GCUGCC  
          GGGU CGG AUGA UGAUGG  
miRNA 3' UAA AG AA 5'

-----  
dataset: 1  
target: GU385879.2  
length: 2736  
miRNA : ghr-miR7508  
length: 21  
  
mfe: -21.8 kcal/mol  
p-value: 1.000000e+00

position 2282  
target 5' G A GAG A 3'  
          CCUGAC UCU CUUG  
          GGGCUG AGA GAAC  
miRNA 3' GAGA A AAA 5'

-----  
dataset: 1  
target: GU385879.2  
length: 2736  
miRNA : ghr-miR7509  
length: 24  
  
mfe: -20.8 kcal/mol  
p-value: 1.000000e+00

position 2162  
target 5' C C U G 3'  
          UG CUG CG AAAGUGCU  
          AC GAC GU UUUCACGA  
miRNA 3' UA A U AAACU 5'

-----  
dataset: 1  
target: GU385879.2  
length: 2736

miRNA : ghr-miR7510a  
length: 24

mfe: -27.9 kcal/mol  
p-value: 1.000000e+00

position 694  
target 5' U       UUUCUUG           A    A   3'  
          GAUGUU       GUUAGAGAUCCU GACC  
          UUGC GG       CGAUUUCUAGUA CUGG  
miRNA 3'                                   AA 5'

---

dataset: 1  
target: GU385879.2  
length: 2736  
miRNA : ghr-miR7510b  
length: 23

mfe: -24.6 kcal/mol  
p-value: 1.000000e+00

position 2175  
target 5' G       GGCGU   C       GG   G   3'  
          UGCUGC       AAG GUCGUG   CU  
          GCGGCG       UUC UAGUAC   GA  
miRNA 3' U       AU                   AA   A   5'

---

dataset: 1  
target: GU385879.2  
length: 2736  
miRNA : ghr-miR7511  
length: 24

mfe: -22.5 kcal/mol  
p-value: 1.000000e+00

position 1399  
target 5' C   AUUA   G   UCC           G   3'  
          CAG    UGC ACA   UGCAAGGCU  
          GUC    AUG UGU   ACGUUUUGA  
miRNA 3' GA   G                   AGA 5'

---

dataset: 1  
target: GU385879.2  
length: 2736  
miRNA : ghr-miR7512  
length: 21

mfe: -23.5 kcal/mol  
p-value: 1.000000e+00

position 917  
target 5' U CA AAGC A 3'  
GUGUAUAAC GCAGG UGGCA  
UACGUAUUG UGUUC AUCGU  
miRNA 3' G A 5'

---

dataset: 1  
target: GU385879.2  
length: 2736  
miRNA : ghr-miR7513  
length: 21

mfe: -26.8 kcal/mol  
p-value: 1.000000e+00

position 1351  
target 5' U GA G G 3'  
GGACGGUU C UGGCUGAU  
UUUGCUAA G ACCGACUA  
miRNA 3' AG G A 5'

---

dataset: 1  
target: GU385879.2  
length: 2736  
miRNA : ghr-miR7514  
length: 24

mfe: -20.7 kcal/mol  
p-value: 1.000000e+00

position 1522  
target 5' U UC CCCUGUGCUG A 3'  
GCG UCUCGCUU UACUUUG  
UGC AGAGUGAA GUGAAAU  
miRNA 3' UC U UA A 5'

---
