# Supplementary material for: Genome-Wide Identification of Cotton MicroRNAs Predicted for Targeting Cotton Leaf Curl Kokhran Virus-Lucknow
Source: Preprints.org preprint supplement (doi:10.20944/preprints202309.1992.v1), 2023-09-28
Supplement: Supplementary file 1 [file Table S1.xlsx]

## Sheet: Sheet1
miRNA No	miRNA IDs	miRNA Accession IDs	Mature miRNA Sequences
156	>ghr-miR156a	MIMAT0005806	UGACAGAAGAGAGUGAGCAC
156	>ghr-miR156b	MIMAT0005807	UGACAGAAGAGAGUGAGCAC
156	>ghr-miR156c	MIMAT0005808	UGUCAGAAGAGAGUGAGCAC
156	>ghr-miR156d	MIMAT0005809	UGACAGAAGAGAGUGAGCAC
160	>ghr-miR160	MIMAT0029137	UAUGAGGAGCCAUGCAUGUAU
162	>ghr-miR162a	MIMAT0005812	UCGAUAAACCUCUGCAUCCAG
164	>ghr-miR164	MIMAT0014331	UGGAGAAGCAGGGCACGUGCA
166	>ghr-miR166b	MIMAT0005813	UCGGACCAGGCUUCAUUCCCC
167	>ghr-miR167a	MIMAT0014332	UGAAGCUGCCAGCAUGAUCUA
167	>ghr-miR167b	MIMAT0025838	UGAAGCUGCCAGCAUGAUCUA
169	>ghr-miR169a	MIMAT0025839	UAGCCAAGGAUGACUUGCCUG
169	>ghr-miR169b	MIMAT0029157	CAGCCAAGGAUGAUUUGCCGG
172	>ghr-miR172	MIMAT0014333	AGAAUCCUGAUGAUGCUGCAG
390	>ghr-miR390a	MIMAT0005815	AAGCUCAGGAGGGAUAGCGCC
390	>ghr-miR390b	MIMAT0005816	AAGCUCAGGAGGGAUAGCGCC
390	>ghr-miR390c	MIMAT0005817	AAGCUCAGGAGGGAUAGCGCC
393	>ghr-miR393	MIMAT0014334	UCCAAAGGGAUCGCAUUGAUCU
394	>ghr-miR394a	MIMAT0014336	UUGGCAUUCUGUCCACCUCC
394	>ghr-miR394b	MIMAT0014335	UUGGCAUUCUGUCCACCUCC
396	>ghr-miR396a	MIMAT0005818	UUCCACAGCUUUCUUGAACUG
396	>ghr-miR396b	MIMAT0005819	UUCCACAGCUUUCUUGAACUG
398	>ghr-miR398	MIMAT0014337	UGUGUUCUCAGGUCACCCCUU
399	>ghr-miR399a	MIMAT0005820	CGCCAAUGGAGAUUUGUCCGG
399	>ghr-miR399b	MIMAT0005821	CGCCAAUGGAGAUUUGUCCGG
399	>ghr-miR399c	MIMAT0014349	UGCCAAAGGAGAGUUGGCCUU
399	>ghr-miR399d	MIMAT0014350	UGCCAAAGGAGAUUUGCCCUG
399	>ghr-miR399e	MIMAT0025840	UGCCAAAGGAGAUUUGCCCCG
479	>ghr-miR479	MIMAT0014338	CGUGAUAUUGGUUCGGCUCAUC
482	>ghr-miR482a	MIMAT0014339	UCUUUCCUACUCCUCCCAUACC
482	>ghr-miR482b	MIMAT0014340	UCUUGCCUACUCCACCCAUGCC
827	>ghr-miR827a	MIMAT0014341	UUAGAUGACCAUCAACAAACA
827	>ghr-miR827b	MIMAT0014342	UUAGAUGACCAUCAACAAACA
827	>ghr-miR827c	MIMAT0014343	UUAGAUGACCAUCAACAAACA
2948	>ghr-miR2948-5p	MIMAT0014344	UGUGGGAGAGUUGGGCAAGAAU
2949	>ghr-miR2949a-3p	MIMAT0015374	UGCAAAUCCAGUCAAAAGUUA
2949	>ghr-miR2949a-5p	MIMAT0014345	ACUUUUGAACUGGAUUUGCCGA
2949	>ghr-miR2949b	MIMAT0014346	UCUUUUGAACUGGAUUUGCCGA
2949	>ghr-miR2949c	MIMAT0014347	UCUUUUGAACUGGAUUUGCCGA
2950	>ghr-miR2950	MIMAT0014348	UGGUGUGCAGGGGGUGGAAUA
3476	>ghr-miR3476-3p	MIMAT0015654	AGCCAACAACAUCAGUUCUAA
3476	>ghr-miR3476-5p	MIMAT0015653	UGAACUGGGUUUGUUGGCUGC
7484	>ghr-miR7484a	MIMAT0029124	UUUGUAUAUUAGAUCAAAGAGCAA
7484	>ghr-miR7484b	MIMAT0029125	UUUGUAUAUUAGAUCAAAGAGCAA
7485	>ghr-miR7485	MIMAT0029126	AAAGACAUCUUUGAAUUCUUGGAG
7486	>ghr-miR7486a	MIMAT0029127	AAGGAAGCGCUUUGUCCACGUGGA
7486	>ghr-miR7486b	MIMAT0029128	AAGGAAGCGCUUUGUCCACGUGGA
7487	>ghr-miR7487	MIMAT0029129	AUACUCUUAUAGGACACUUGUUAA
7488	>ghr-miR7488	MIMAT0029130	UUUUGAGUACAGGGGACAAAA
7489	>ghr-miR7489	MIMAT0029131	AUUGUUGCCAAUACAGGAGAACGU
7490	>ghr-miR7490	MIMAT0029132	AGUCUAGAAAACUUCACUGACGGU
7491	>ghr-miR7491	MIMAT0029133	UGGGAUCUUCGAGAGGAUUGAGCC
7492	>ghr-miR7492a	MIMAT0029134	CUAUAGAACAUGAUCUUUAGCGG
7492	>ghr-miR7492b	MIMAT0029135	CUAUAGAACAUGAUCUUUAGCGG
7492	>ghr-miR7492c	MIMAT0029136	CUAUAGAACAUGAUCUUUAGCGG
7493	>ghr-miR7493	MIMAT0029138	AAUAUUUUAAUAAUUCAAUCGUCA
7494	>ghr-miR7494	MIMAT0029139	AGCUUGUGGACUAGUUUUAACAA
7495	>ghr-miR7495a	MIMAT0029140	UUACUUUAGAUGUCUCCUUCA
7495	>ghr-miR7495b	MIMAT0029141	UUACUUUAGAUGUCUCCUUCA
7496	>ghr-miR7496a	MIMAT0029142	AUGACCAAAUUGAUAGAAUGUGUA
7496	>ghr-miR7496b	MIMAT0029143	AUGACCAAAUUGAUAGAAUGUGUA
7497	>ghr-miR7497	MIMAT0029144	ACAUGUGGACUGUCAUAUGGGUU
7498	>ghr-miR7498	MIMAT0029145	AUGGUGACACAUGGUAGUCUCACA
7499	>ghr-miR7499	MIMAT0029146	AUAUAAUUUUCGGUUAAUUCGGUU
7500	>ghr-miR7500	MIMAT0029147	AUCGAGUUAUUCGAGUUAAUCGAG
7501	>ghr-miR7501	MIMAT0029148	AUAUCUGAUUCUGACACGAAAAAA
7502	>ghr-miR7502	MIMAT0029149	UUUUUAACAGUAGAAAUGAAUGAA
7503	>ghr-miR7503	MIMAT0029150	AGAUCGAUGGCUGAACAAGUUAGA
7504	>ghr-miR7504a	MIMAT0029151	UAUGAAACUGUGAUUCCACGUCAU
7504	>ghr-miR7504b	MIMAT0029159	AGGAGGAAAAAUCUGAUUUGUCAU
7505	>ghr-miR7505	MIMAT0029152	UUCAGAAACCAUCCCUUCCUU
7506	>ghr-miR7506	MIMAT0029153	AUGUCUGGGACAUGGCGUUGGCAC
7507	>ghr-miR7507	MIMAT0029154	AAGGUAGUGAAGUAGGCAAUUGGG
7508	>ghr-miR7508	MIMAT0029155	CAAGAAAAGAAGUCGGGAGAG
7509	>ghr-miR7509	MIMAT0029156	UCAAAAGCACUUUUUGACAGCAAU
7510	>ghr-miR7510a	MIMAT0029158	AAGGUCAUGAUCUUUAGCGGCGUU
7510	>ghr-miR7510b	MIMAT0029163	AAGAACAUGAUCUUUAGCGGCGU
7511	>ghr-miR7511	MIMAT0029160	AGAAGUUUUGCAUGUGUAGCUGAG
7512	>ghr-miR7512	MIMAT0029161	UGCUACUUGUAGUUAUGCAUG
7513	>ghr-miR7513	MIMAT0029162	AAUCAGCCAGGAAUCGUUUGA
7514	>ghr-miR7514	MIMAT0029164	AUAAAGUGAUAAGUGAGAUCGUCU
