# Supplementary material for: Genome-Wide Identification of Cotton MicroRNAs Predicted for Targeting Cotton Leaf Curl Kokhran Virus-Lucknow
Source: Preprints.org preprint supplement (doi:10.20944/preprints202309.1992.v1), 2023-09-28
Supplement: Supplementary file 2 [file Table S2.xlsx]

## Sheet: Sheet1
miRNA Nn.	miRNAs ID	Accession No.	Precursor miRNA
156	>ghr-MIR156a	MI0005638	AAGGGAGGUGACAGAAGAGAGUGAGCACACAGGGUACUUUCUUGCAUGCUUGAGCCUUUCAUGCUUGAAGCUCUGCGUGCUCACCCUCUAUCUGUCAUCCACUU
156	>ghr-MIR156b	MI0005639	GGUGACAGAAGAGAGUGAGCACACAGGGUACUUUCUUGCAUGCUUGAGCCUUUCAUGCUUGAAGCUCUGCGUGCUCACCCUCUAUCUGUCAUCCACUUUUCUCUCUCUCUCUC
156	>ghr-MIR156c	MI0005640	GGUGUCAGAAGAGAGUGAGCACACAGGGUUCUUUGUAGCAUGCUUGAGCCUUUCAUGCUAGAAGCUAUGUGUGCUCACCCUCUAUCUGUCAUCCACU
156	>ghr-MIR156d	MI0005641	GAGAGGUUUGACAGAAGAGAGUGAGCACACGCAGGCAGAUUGUAUGAAAGGCCAUACCUUUGCCCGCCGUGUGCUCACUUCUCUUCUGUCAGCUUA
160	>ghr-MIR160	MI0024179	CAUCCAUGUAUGUAUGUGCCUGGCUCCCUGUAUGCCAUUUGCAGAGCCCAUUGAACUUCGAUAGCCUCCGUGAAUGGCGUAUGAGGAGCCAUGCAUGUAUUCUAUGUAUU
162	>ghr-MIR162a	MI0005644	UUUUUAGCGUUGGGGUAAAGACACUGGAGGCAGCGGUUCAUCGAUCUCUUCCUGAGAAUUUUGUUGUGAGAAUAACACAAAUACAUGAAUCGAUCGAUAAACCUCUGCAUCCAGCGCCUUAACUCUCCAUGAAGUUUUAUGUUAGUUA
164	>ghr-MIR164	MI0013538	GGGGUGAGUAUCUCUUGUUGGAGAAGCAGGGCACGUGCAAGUUCCUAUGUUUAAGUGAACUUUGCACGUGCUCCCCUUCUCCACCGUGAGUUUCUCAUUCU
166	>ghr-MIR166b	MI0005645	UGAGGGGAAUGUUGUCUGGACCGGGGACACUUGUGUUUCUAAUCCGUUUUCCCUGCAAUAUUGUUCUGAUUAACGUGGGGAUCUUUAUAUUGCUUAUUUUUGUAAUGGAUUAAGGUUGUACUAGUGUCGUCGGACCAGGCUUCAUUCCCCCCAA
167	>ghr-MIR167a	MI0013539	GGGAAAAAGUGAAGCUGCCAGCAUGAUCUAUCUUCCGUUAGUAAGAUGCGGAUGCUAUAUUGCUAACCCUAGCUAGGUCAUGCUGCGACAGCCUCACUCCUUCCU
167	>ghr-MIR167b	MI0022545	GCGUGAACCUACAAGCAGUUGAAGCUGCCAGCAUGAUCUAAACUUCCUUCUCUGUUGAGGGAUAGAUGGGAUCAUGUGGUAGCUUCACCUGUUGUUGGGAUCACGA
169	>ghr-MIR169a	MI0022546	AGAUAAAGAGUCUUGUUUGGUAGCCAAGGAUGACUUGCCUGCACCUAAUGUCCACGAGGUUUUAAUACAUCAAAAACCCUGGUUGGGUCCCAGGCAGUCACCUUGGCUAACUAGACAGGCUGUUUUCAU
169	>ghr-MIR169b	MI0024199	UAAAGUAGUGCAGCCAAGGAUGAUUUGCCGGCUAGGCUUUCUCUUCCACUUAUCUGAGUUGUUUUUUGAUACUCGUUAAUUACUCAAAACUAUUUAUGUUAAUGGUUUGAACUGUUCAUGGGAACGGGAAGUUAAUUAUUUAAUACAUAAAUGAAUCAAACCUUUGUUGGAGGAGAUAAUCGGCAAGUUGUCUUUGGCUACGUUUCUUUC
172	>ghr-MIR172	MI0013540	AGUCACUGUUUGCUGUUGGAGCAUCAUCAAGAUUCACAAUUUUAGGGUUCUUUUUUGAUUGAUUUGAUCAAUCAGCCUUUUUAUGAUUGAGAAUCCUGAUGAUGCUGCAGUGGCAAUAAGUGGCU
390	>ghr-MIR390a	MI0005647	UGGAAGAAUCUGUUAAGCUCAGGAGGGAUAGCGCCAUGGAUGAUCCAUCUUUCAAGCUUUCAUGCAUGUAUGUUAUUUGAUCCUCAUAUAGCGCUAUCCAUCCUGAGUUUCAUCGGUUCUUCUU
390	>ghr-MIR390b	MI0005648	GUAUGGAAGAAUCUGUUAAGCUCAGGAGGGAUAGCGCCAUGGAUGAUCCAUCUUUCAAGCUUUCAUGCAUGUAUGUUAUUUGAUCCUCAUAUAGCGCUAUCCAUCCUGAGUUUCAUCGGUUCUUCUUGCUUG
390	>ghr-MIR390c	MI0005649	AGAAUCUGUUAAGCUCAGGAGGGAUAGCGCCAUGGAUGAUCCAUCUUUCAAGCUUUCAUGCAUGUAUGUUAUUUGAUCCUCAUAUAGCGCUAUCCAUCCUGAGUUUCAUCGGUU
393	>ghr-MIR393	MI0013541	GGUGGAGAGCUCCAAAGGGAUCGCAUUGAUCUAAUGUUGAUGAUGGGCUUCCUUGAAAACCUUAACGAAUUAAUUAUUGAUUUUUGUUGAUUCAGUUCAGUACCCAUUGGAUCAUGCGAUCCCUUCGGAAUUUUCCAUC
394	>ghr-MIR394b	MI0013542	UAGGGGUUCUUAGAGGCUUUGUUGCAGAGCCAAUUUGGCAUUCUGUCCACCUCCAUUGAUGUACUUCUUCUUACCUACCCAACUUAUAAAAUGAUUUGUCUUUGAAGUAAUGGAGGCGGCCAGUAUGUCAAAUAGACUCUGUAAAUUUCUCUCUGAGAAACCCUA
394	>ghr-MIR394a	MI0013543	UGCUUUCAUGGGGGUUUAGCAAAGGGCUUCUUACAGAGUUUAUUGGCAUUCUGUCCACCUCCCCAUCAUGGAAAAAGUCCGUAUUUUUCCCCUCUGGUUUUUCAUGGAGGUGGGCAUACUGCCAACUGUGCUCUGUUGGCUUCUCUUUGUAAAAUCCUUGUGAUGCA
396	>ghr-MIR396a	MI0005650	CUUCGUAUUCUUCCACAGCUUUCUUGAACUGCAAUUUCAUGUAAUCAGAUCAUUCAUUCAUUCGUUGUCGUUGAUGGUGCUGCAUAUAUACGAGUACGUUGUUGCGGUUCAAUAAAGCUGUGGGAAGAUACAAACA
396	>ghr-MIR396b	MI0005651	CUUCGUAUUCUUCCACAGCUUUCUUGAACUGCAAUUUCAUGUAAUCAGAUCAUUCAUUCAUUCAUUGUCGUUGAUGGUGUUGCAUACAUACGAGUACGUUGUUGCGGUUCAAUAAAGCUGUGGGAAGAUACAAAC
398	>ghr-MIR398	MI0013544	GCCAAGAUGGUUUACCCCAGAGGGGUGCCACCUAAGAACACAGGUCAUCCCUUAACCAAAUAGCUUGUGUUCUCAGGUCACCCCUUUGGGGUACAUAUAUCUUCGC
399	>ghr-MIR399a	MI0005652	UGAGAUAUUACAGGGCAAAAUCUUCAGUGGCAGGCAGUAUAUGGCUCCAUUCAUCAGGCAUCAGCUGUAUGGAAAAUUGCAGUGUGUUCUCCGCCAAUGGAGAUUUGUCCGGUAAUUCCGGUUC
399	>ghr-MIR399b	MI0005653	UGAGAUAUUACAGGGCAAAAUCUUCAGUGGCAGGCAGCCAUUGUAUAUGGCUCCGUUCAUCAGGCAUCAGCUGUAUGGAAAAUUGCAGUGUGUUCUCCGCCAAUGGAGAUUUGUCCGGUAAUUCCGGU
399	>ghr-MIR399c	MI0013556	AGGGCUUCUCUGCAUUGGCAGGUAGAUGAUAACUCCACAUCAUGUAGUUAACCUGCCAAAGGAGAGUUGGCCUU
399	>ghr-MIR399d	MI0013557	UGAGGAAUUACAGGGCAACUCUCCUUAAGCAAAAAUGGAUGUGCUUUUCUUUGCAUAAUUCGAUUUUGCCAAAGGAGAUUUGCCCUGCCAUUCACUCA
399	>ghr-MIR399e	MI0022547	AAAAAUGCAUGGGUGCAUUACUGGGUGAAUCUCCUUUGGAAGGCAACUAAAACUCGGUUACAUUGCAUGUUGGCAUGCCAUGUGGUGGGCGACAUGCGAUGCGAUGCUUAGCUCACUGCCAAAGGAGAUUUGCCCCGCAAUUCAGCCAUGCAACACG
479	>ghr-MIR479	MI0013545	GGAGGAGUAGACACGACGUGAUAUUGGUUCGGCUCAUCUUAUUGUGAUUAAAAAUUUCAAGGCGAGCCGAAUCAAUAUCACUCAUGUAUGCUUUUUU
482	>ghr-MIR482a	MI0013546	AUUGUUAAAGAGGGAAAGGGAGAAAGAGUUGCCGGGAGUUUAUGGAAGUGGGAUGGGUGGAAAGAUUUGUAUUUUCUCUCUUGAGUUUCUAAGAAUGUAAAGCAAAUCUUUCCUACUCCUCCCAUACCACUUAUUUCCAGUUCUUCCUCUCCACUUCUUACUUUUCUCGAU
482	>ghr-MIR482b	MI0013547	AGAGACGAUGGAGAAGGAGCUUAGGAUUCUAGAAAGCUCGUGGGAUGGGUGAGGGGGUAAGACAAUGGACUGUUUCAGUCUUUUGGAAACAGAAAUAAAGAAGAAGGCUGGUUUAUGUCUUGCCUACUCCACCCAUGCCACUGGUUUCCUGGUGUUCCUCCUCCUCCUAAAGUCUCU
827	>ghr-MIR827a	MI0013548	AUGCAUUGUUGAAUGUGUUUGUUUAUGGUCAUCUAAGCCAUUUUUCAUCUCGCCAAUUCUUUGUUCAAGCAGUUUUUGGAUAAUCGAACCGAUAGACUACACCCGCAGAAAUGAUGUUUAGAUGACCAUCAACAAACAACUUCAUCUUAUUGCAU
827	>ghr-MIR827b	MI0013549	CUUUUUCUUUUCAUGAAAAUGCAUUAUUGAAUGUGUUUGUUUAUGGUCAUCUAAGCCAUUUUUCAUCUCGCCAAUUCUUUGUUCAAGCAGUUUUUGGAUAAUCGAACCGAUAGAAUACACCCGCAGAAAUGAUGUUUAGAUGACCAUCAACAAACAACUUCAUCUUAUUGCAUCAAGUGUUCAAGAUUUAAG
827	>ghr-MIR827c	MI0013550	AUGCAUUGUUGAAUGUGUUUGUUUAUGGUCAUCUAAGCCAUUUUUCAUCUCGCCAAUUCUUUGUUCAAGCAGUUUUUGGAUAAUCGAACCGAUAGACUACACCCGCAGAAAUGAUGUUUAGAUGACCAUCAACAAACAACUUCCUCUUAUUGCAU
2948	>ghr-MIR2948	MI0013551	GUAAGAGAAAGGGAGAGAGUGGUGUUGGGAGUUGGAGGUGUGGGAGAGUUGGGCAAGAAUUAUGACCUUUGUUCAAUCCAAAGGGGCAAUUCUUACCAACCCCUCCCAUACCCUUGAUUUCCAACCGUUGCUCCCCUUCCCUGCCUUGGAUC
2949	>ghr-MIR2949a	MI0013552	GUCUUAGUUUGCGUCUUGACUUUUGAACUGGAUUUGCCGACUUGAACUGCGUUGUUGAUGGUUUCCAAAACCCGAGCCUGCAAAUCCAGUCAAAAGUUAAAACCGGGCUGAGAU
2949	>ghr-MIR2949b	MI0013553	CAUGAUGCUGCUCAGUAUUUUAAUACUGGUCUUACUGUCUUAGUUUGCGUCUUGUCUUUUGAACUGGAUUUGCCGACUUGAACUGCGUUGUUGAAGGUUUACAAAACCCGAGCCUGCAAAUCCAGUCAAAAGUUAAACCGGGCUGAGAUUUACGAAUCUGAUAUAUAUUGGGAGGUAUUAUG
2949	>ghr-MIR2949c	MI0013554	CAUGAUGCUGCUCAGUAUUUUAAUACUGGUCUUACUGUCUUAGUUUGCGUCUUGUCUUUUGAACUGGAUUUGCCGACUUGAACUGCGUUGUUGAAGGUUUACAAAACCCGAGCCUGCAAAUCCAGUCAAAAGUUAAACCGGGCUGAGAUUUACGAAUCUGAUAUAUAUUGGGAGGUAUUAUG
2950	>ghr-MIR2950	MI0013555	CAUGGGUUUAUGUUAUAUUCCAUCUCUUGCACACUGGACUAGCCAGCUUUUUGUUGGCUUCAGCUUCAGGUUGGUGUGCAGGGGGUGGAAUACAUCAUUGAUAUCAUG
3476	>ghr-MIR3476	MI0014715	UAUCUUGAUUUGAACUGGGUUUGUUGGCUGCUGAUCUGCUUUUUUGAAGCAGAUAUCAAAUCUAGUUAAUAAAACACUUUUCAGGAGCCAACAACAUCAGUUCUAACCAGGACU
7484	>ghr-MIR7484a	MI0024166	UAAACUAGUUUUUGUAUAUUAGAUCAAAGAGCAAACCAGUCAUUUGUUAAAAAUUUCAUACAUUUUUACUGUUAAAAACUGGUCCUUAUACCUCAGCAUGAAGUACACAUGGCACAUGUAAUUGCCUAGUCAUUCUGUCAAUUAAACCAGUUUUCAAAAGUAAAAAUGGAUGGAAUUUUUAACAAAAAAGACCAGUUUGCUCUUUGAUUUAAUAUACAGAGACUAAUUUG
7484	>ghr-MIR7484b	MI0024167	AUUAUAAAUUUUUGUAUAUUAGAUCAAAGAGCAAAUGAUCCUUGUGUUAAAAUUUUCAUCUAUUCUCCUAUAUAAAUUAGUAAGGGUAGGUCACCAUGAGGUCCCCAGGGCAUAUCAGGUGUCAUUAUUUAUCCAAUUCCCCCAGUCACUUCAGUUUUUAUCAGUAUAAAUGGAUGCAAUUUUUACCCAAAAAAAUGGAUUGCUUCUUUAAUCUAAUUUAUAGGGAUUAAACUA
7485	>ghr-MIR7485	MI0024168	AUGACCAUCUAAAGACAUCUUUGAAUUCUUGGAGUAAUUCCAUGAGGUCUCGUCUUGUCUUUGCAGAGAUCUCAGUUCCAAUUUUCACCUCUUUCCCUUCUUCCAAGCUCACAACUUCUAUUGCUUCCUUGUGAGGUAGAAUUUGUUUUUCUUCCUAUUCUACCAUCCUUAUCAAAUCCAAAGAUAAACCACCAUCUAUGUCACCUUCAAAGUCCUGCGAUCCCUCUAAACACAUGUUUCAUUCAAAAGAAAACUCUGAGUUUGUAGCGGCGUCAUUCACGUCAUUGAUAUACACGGACCUAAUAUGGUUACAAAAGAAUGUAUGAAUUUAUGUACAAUUAUUUGUGCAAUAUGAUUAUAAAUGAAAGAAUAAUUUAAGGUAUUUACUCGUAUAGAAAG…
7486	>ghr-MIR7486a	MI0024169	ACGCUUCUUCAAGGAAGCGCUUUGUCCACGUGGACAGAAUACGCGUCCUUGAGGGCGCGCUUUGUGUCCACAUGGACAAAGCGCUUCCUUGAGGAAGCGUUUUCC
7486	>ghr-MIR7486b	MI0024170	GCACUUACUCAAGGAAGCGCUUUGUCCACGUGGACAGAAAUUGUAUCCUUGAGGGCGCACUUUCUGUCCACGUGGACAAAGCGCUCCCUUGAGAAAGCGUU
7487	>ghr-MIR7487	MI0024171	AGGUUAAUGGGUUACAAGUAUCCUAUAAAAGUAUAGUAAAAUAUUAAAAAAAUAAAUUUUAAAAAAAAGGAAGACGCAUGCCAAAUUUUAAAAAAUGUGUGGAAUUUAAAAAAAAAACUGCUAGUGUACCAAAUACUAACCUUUAAAAUUGGACUAAAAUUUGAGUGAGUAUUUGGUACACUAGCAGAAUGUUUUUUUUUAUUCCACAAGCAACCUUAAAAAGUUGUCAUAUGUCUUCUUCUUUUUAAUAUUUUACUAUACUCUUAUAGGACACUUGUUAACCCCUAACUC
7488	>ghr-MIR7488	MI0024172	UCAGAUUGUAUUUUGCUUCUUUUAUUCAAAAAAAGGGGGCAAUUAGUCUUUGUAUGUUAGACCAAAGAGCAAACUAGUCAUUUUUGUUAAAAAUUCCAUCAAUUUAUACAGUUAAAAAAUAUGACGUGCCAUGUCUAUAGGGACCGAUUUUUUAAUAGUAGAAAUAUAUGAGAUUUUUAACAAAAAGGAUCCAUUUGCUUUUUGAUUUAAUGUACAAGGAUUAAUUUGCUCACUUUUUGAGUACAGGGGACAAAAUACAAUCUAA
7489	>ghr-MIR7489	MI0024173	UGGUAUGGGCAUUGUUGCCAAUACAGGAGAACGUGGBUCUUUUUGACAUAAUGCCUAGAACUACCCAUAGCUCCAUCCCAACUCAUAAAUAGGAGGAUAAGACUGAAUUCACGUCCUCCUAUACUGGUAACAAUGCGCAUGCCAA
7490	>ghr-MIR7490	MI0024174	UUAUUUGAUACACUGCGGUGGAGAUUUUUGACUCCACAAGCAUAUUGAGGAUUUGGUAAAGUGUAUUAUAUGGUGUAGUAAAAAAUAAAAAAAUUUAUUAUAUAAAUAAAUGUGAGACUUGUCACACUCUUAACACGUUUGUGGAGUCUAGAAAACUUCACUGACGGUGUAUCAAAUA
7491	>ghr-MIR7491	MI0024175	CUCGGGUAUUUGGGAUCUUCGAGAGGAUUGAGCCCUACUUAUUGGGGUUCCAAUUUUCCUCGGUGAAUCUAAAUAAUCGAGA
7492	>ghr-MIR7492a	MI0024176	ACAAACGCCGCUAUAGAACAUGAUCUUUAGCGGGCGUUCUCCACAAACUUCGCUAAAGAACAUGACUUUAGCAGCGUUUUUUUAUGAGAAGUGUCGCUAAAGGUCAUGUUCUAUAGCGGCGUCCCACAUAA
7492	>ghr-MIR7492b	MI0024177	AAAAACGUCGCUAUAGAACAUGAUCUUUAGCGGCAUUUUUAUUUCAAUCACCACUAAAGAAUAUGAUCUUUAAUGGCAUUUGUUUUCAAAUGCCACAAGAGAGUCGAGCAUGUUGGGGCAUUUGAAGUUAGAAUCUCCGCAAAAGAUCAUGUUCUUUAGCGGUGUUUGUAGUAAAA
7492	>ghr-MIR7492c	MI0024178	GAAAAUGCCGCUAUAGAACAUGAUCUUUAGCGGCACUUUCCCUACAAACGUCACUAUAGAACAUGAUCUUUAGCGACACUUUUAUUACAAACACCGCUAAGGAACAUGAUUUUUAGCGACGUUUUUUUUACAAACGCCGCAAAAGAGUCGAGCAUGUUGUGGUGUUUGUAACUAGAAUCGCCGCAAAAGAUCAUGUUCUUUAGCGGCAUUUACG
7493	>ghr-MIR7493	MI0024180	UUAUAUGAUUAAUAUUUUAAUAAUUCAAUCGUCAGAUUUUUAAAUAUAUUUGUACUUGUCAUACAAAUAAAAUUUUGAAUCAGUCUAAAUUUUUAUUAUAUCGAUCUAAAAUAUUGUUUACAUUAAUAUAUAUUUAACUGUUAAAAUUUCUUUAACAUAAAAUAUUUAAUUCAUGUCAAACUUGACGUGCAUAAUCUACAAAAAUGGACCAUAAAAUAUGAUGGUUGGAUUGUUAAAAUAUUAAUUAUACAA
7494	>ghr-MIR7494	MI0024181	UAUUCUCCGUUUGUUAAAACUAGUCCCUACACUUUUAUUUUUUUGAACAAUUUAAUUUUUUCGAGUGAGAUAAGCUUGUGGACUAGUUUUAACAAAUGAAAAAUA
7495	>ghr-MIR7495a	MI0024182	UUCAACAGCUUGAGGGAAACAUCUAAAGUAAACGACGAACGAACUUCCAUUGAUAACCGAUGAACUUAGUGUUUGAAGGAAGCAAGAUCAUUUCCCGGUUUCAUUUUUCUUCCGUCGGUCAGGUAGUUCGCCUGGUUUUUACUUUAGAUGUCUCCUUCAUGCUGUCUGU
7495	>ghr-MIR7495b	MI0024183	UUCAACAGCUUGAGGGAAACAUCUAAAGUAAACGACGAACGAACUUCCAUUGAUAACCGAUGAACUUAGUGUUUGAAGGAAGCAAGAUGUCUCCUGGUUUUUACUUUAGAUGUCUCCUUCAUGCUGUCUGU
7496	>ghr-MIR7496a	MI0024184	CCUCCAUGUUUACAUAUUUUGUUAAUUUGAUCUUGAUUCUAAAAAACUAAACAAAAUUAGCCUCAACAUUUACACAUUUACAAAAAUAUUAUAGGCUAAUUUUGUUAAAUCAUGACCAAAUUGAUAGAAUGUGUAAAAUAGGAGA
7496	>ghr-MIR7496b	MI0024185	CCUCCAUGUUUACAUAUUUUGUUAAUUUGAUCUUGAUUCUAAAAAACUAAACAAAAUUAGCCUCAACAUUUACACAUUUACAAAAAUAUUAUAGGCUAAUUUUGUUAAAUCAUGACCAAAUUGAUAGAAUGUGUAAAAUAGGAGA
7497	>ghr-MIR7497	MI0024186	UAAACAUGAUAACUUGAAUGACAAUCUAUAUGUACUUCAUGUUAAUUUUUUUUGAAUUUUUAUAAUUUUAAAUAUAAUCUAUUUUAUAGUUUUUAAAAUUAUUUGUUGACAUGGCAUAUAAGACAUAGUACCAUGUCAGCAUGAAAGUACAUGUGGACUGUCAUAUGGGUUGUUACACUAA
7498	>ghr-MIR7498	MI0024187	GACCAAUAGCAUGGUGACACAUGGUAGUCUCACAUUUUGACACAUGGCACUUUUAAAAAUUUUUAUUAUUUCAAGUUUCAAAAUGUUAGCCUACCACGUGUCACCAUGCUAUUGGUUG
7499	>ghr-MIR7499	MI0024188	AAUAAAAAACAUAUAAUUUUCGGUUAAUUCGGUUAACCAACCGAAUUAACUGAAAAAUAUCGGUUUGGUUAAG
7500	>ghr-MIR7500	MI0024189	AGUUAAACAAAUCGAGUUAUUCGAGUUAAUCGAGUUAUCGAAUCACCUCGAAUUUUUUUUUUCGAAUUUCGAGUUCGAAUCAGUUGAGCUUUCGAAAUUCGAAUAACUCGAAAUAUUUCGAA
7501	>ghr-MIR7501	MI0024190	CGGGGACCCACUUUUUCGUGUCAGAAUCAGAUAUAAAAAUACGAAAAAAAUAAAAAAAAUUUUAUAGGACUUGGGGGAUUUUAAUAUAUAAACUAAAUUCUAAAUUUACAAAAAAAUAUAUAGGACUUGGGGGAUUUUAAUUUUGUAAUAGUAAAUAGGAGGAAAUAGAAAUUUUUUUUACUUUUUUUCAUAUUUUUAUAUCUAAUUCUGACACGAAAAAAAAAUUUACUGUUCACUGGGUGCCGGCCAUUGAUAGGCCAACACCCAAAUUUUUUUUUUUUCCUAUUUUAUAUCUGAUUCUGACACGAAAAAAAAGAAAAAAA
7502	>ghr-MIR7502	MI0024191	UUGUUAAAAAUGUCAUCUAUUUUUACUAUUAAAAAGUCCUUGCACAUUAGAAUAAGGUACAUGUAACUGUUUAGUUAUUCUAUAGCAAUGUCAAUUUUUAACAGUAGAAAUGAAUGAAUUUAUUACUA
7503	>ghr-MIR7503	MI0024192	CAGUAAUACUAGAUCGAUGGCUGAACAAGUUAGAUCACUAGUUUCCGAUUCAAUCAAUUCGAUCGCCAGACCAACAAUAAUUAAAGAAAUAAUUAAAAAUUCAUAAAAUCUAAAAAAUCAAAUAAAUAAAAAAAUUUAUUAUACCGAUUCAACCUGUUCAACUAUCGAUUUUGUCAUGAUU
7504	>ghr-MIR7504a	MI0024193	AAUGGACUUGUAUGAAACUGUGAUUCCACGUCAUUUUUAUCCCUUUCCUUUAGGAGAAUGACAAAUCAGAUUUUUCCUACUGAAAAUAUCUAAAUCCAAUUAAAAAUGCUAUAAUCAGGAAGAAAAAUUUGAUUUGUCAUUCUCCUAAUAAAAUGGAAUAGGAACAACGUGGAAUCACAAUUUCAUACAAUCCUUU
7504	>ghr-MIR7504b	MI0024201	CCAAUAAGAGAAUGACAAAUCAGAUUUUUCCUUCUGAUUUUUAAUAUUUUUAGUUGAACUUGAAUAUUUUCAGGAGGAAAAAUCUGAUUUGUCAUUCUCUUAUUG
7505	>ghr-MIR7505	MI0024194	UAUUUACGGCUUCAGAAACCAUCCCUUCCUUGCUUAAUUUAUGGAAUCUGUAAUAUACAGAUUGACGCCCCUUGCAAGGAAGGAAUGGUUUCUGAAGCUUUAGGUAAC
7506	>ghr-MIR7506	MI0024195	AGAGGUCCAAUGUUAAGACCAUGUUCUGGACAUUGCGUUGCACAGAUGAGAGGUCCAUGUAAGAACAAUGUCUGGGACAUGGCGUUGGCACUGAGAUGAGA
7507	>ghr-MIR7507	MI0024196	GGGAAAGCUAAAGGUAGUGAAGUAGGCAAUUGGGGUCGAACCACUCUAAAUUAUUUGUGUCCAUUGUUUAAUUCUUGCCUUUGCUUUCACCA
7508	>ghr-MIR7508	MI0024197	UGGCAGGAAGCAAGAAAAGAAGUCGGGAGAGAAUUUUCGAUCGGUUCCCUUUAGCUUCUCAAAACUUAUCCGAAAUCCUUUCCCGGCUUCUUUUCUUGCUUUCGUUUAAU
7509	>ghr-MIR7509	MI0024198	UAGUGUUUAUCAUUACUGUCAAAAAGCGCUUUUGAGAAGAUAAAAUGUCAAUUUUAAACAUGAUGUUAUAAUUGAAAGAUUUAAUGGGAGAUAAAAAAAAAGUAACUUCAUUGAAAAAUACUUUUCCAAAAGCCGAAGGUUAAAAAUUUUGGCUUUUUGGCUUGGGUUAGAAUCACAAUUUAAAAUCAUGGUUUGGUUUGAAGAGCUCUUUGUUUACCAAAUUUUUUGUUUACUAUUAAGGCUUGAAAGCAGUAAACAACAAAAAUUUGGUAAGCAAGCGGGGGUUUAAACCGAACAUGAUUUGGAGAGGGGGGAUUUUAACCAAGCUAAAAAUUUUGGAAAAGUAUUUUUCAACAAAGUUACUUUUUUCAUCUCCCAUUAAAUCUUUCACUUUAUGGC…
7510	>ghr-MIR7510a	MI0024200	AGCGCCGCUAAAGGUCAUGAUCUUUAGCGGCGUUCGUGGCAAAAGCGCCGCUAAAGGUUCGUGGUCUUUAGCGGCCGUA
7510	>ghr-MIR7510b	MI0024205	AACGCCGCUGAAGAACAUGAUCUUUAGCGGCGUGUUUUACUAAGCGCCGCUAAAGAAUAUGUUCUUUAGCGGCGUUU
7511	>ghr-MIR7511	MI0024202	AAUCGGGUCGAGAAGUUUUGCAUGUGUAGCUGAGCAGAGGUAUUUUUAAUUUUUCAAUAUUGUCAGAUAUGUAUAACUUUCCAUUACAUAAUAUUUUUCUUACUUAUAUUGUAGAACUUGUUCGUCGGGUC
7512	>ghr-MIR7512	MI0024203	AUGCCAGUUUUUCACUCAUGCAUGGAUGCUUUUCAGUUAACAUGUAGAACUACAAGCAGCAACCACCAUGCUUCAGCAUAAAUAUGGUAGAUGGUGACUUAAGAUAACGGUUCAAUGCUUAUGAAUGAGACUUUCCUCUGUGUCUCUGUGUGUAUGUAUGAGUGCGAAAUUGAGAGAGAGAAACAGAGAAGUCCAAUGAUGGCGAGUUAGAUAAUGCCAGUUUUCCAGUCAUGCAUGGAUGCCUUCCCAAGGGUGCGAAAGCGAAAAGUUGUUGAACUAUCUGAAAUCCUGCUGAUGCAUGGUGGUUGCUACUUGUAGUUAUGCAUGUUAACCAAAA
7513	>ghr-MIR7513	MI0024204	GCAUGAAUAACCAAACUAUUCCUGGCUGAUUCGCACCAGUUAUUCAUUAGUUUAGUUCAUUGUUUAUCACCGAAUCAGCCAGGAAUCGUUUGAUUAUUCUCAU
7514	>ghr-MIR7514	MI0024206	AAUCCUUAUGGAGACGAUACUUACUUAUCACUUUAUUACUUGAAUGACGUGUACACUUGCACAAUUGCAUUAGUUAUUUUCAUGCAACAUUACACACUCAAGAUCUUUUCUUAUUAAAUAGUUUCCCAAGAAACGAUAUUUUAGCUAGAGAUGAUGGCCAAAUGUUAAAACGGUUGUUGGUUCAUGUGGAGUCUUAAGAAUUCAGAUUCACGAACUGGUUGGAUGUGAUCCAUGUUCUUGCUAGUUAAUCAUGAGACCCUAAGACGACAUGAUUGAUGGGUGUGAGAAUGAUCAUAGCAAUGAAAAAAUAGUUUUUCAAGGUUUUCAUACAAGACACAUGCAUCUGUCACGUGUGAAAUGAUAUGUGAAUUGUGCAGUAUACAUGGAAUCAAGUAUAAA…
