# Supplementary material for: Genome-Wide Identification of Cotton MicroRNAs Predicted for Targeting Cotton Leaf Curl Kokhran Virus-Lucknow
Source: Preprints.org preprint supplement (doi:10.20944/preprints202309.1992.v1), 2023-09-28
Supplement: Supplementary file 3 [file Table S3.xlsx]

## Sheet: Sheet1
Cotton miRNAs	Position (miRanda)	PositionRNA22	Position psRNATarget	Position (RNAhybrid)	Mninimum Free Energy/Kcal/mol (miRanda)	Mninimum Folding Eenergy /Kcal/mol (RNA22)	Expectation psRNATarget	Mninimum Free Energy/Kcal/mol (RNAhybrid)
ghr-miR156a				2500				−21.7
ghr-miR156b				2500				−21.7
ghr-miR156c				2500				−23.5
ghr-miR156d				2500				−21.7
ghr-miR160				2044				−25
ghr-miR162a				1665				−22.3
ghr-miR164				375				−27.2
ghr-miR166b				2038				−23.9
ghr-miR167a				1400				−23.1
ghr-miR167b				1400				−23.1
ghr-miR169a		691		1820		−16.7		−25
ghr-miR169b				2180				−27.2
ghr-miR172				2177				−26.6
ghr-miR390a	2278	2281		2196	−21.48	−18		−26.8
ghr-miR390b	2278	2281		2196	−21.48	−18		−26.8
ghr-miR390c	2278	2281		2196	−21.48	−18		−26.8
ghr-miR393		1735		611		−16.1		−23.2
ghr-miR394a				1459				−22.3
ghr-miR394b				1459				−22.3
ghr-miR396a			1250	1226			6	−22.5
ghr-miR396b			1250	1226			6	−22.5
ghr-miR398				2469				−23.4
ghr-miR399a				2633				−21.9
ghr-miR399b				2633				−21.9
ghr-miR399c				2616				−24.3
ghr-miR399d				2047				−21.6
ghr-miR399e				2615				−21
ghr-miR479				371				−24.6
ghr-miR482a				581				−26
ghr-miR482b				581				−30.5
ghr-miR827a			740	2473			6	−21
ghr-miR827b			740	2473			6	−21
ghr-miR827c			740	2473			6	−21
ghr-miR2948-5p				2611				−29.4
ghr-miR2949a-3p				1655				−20.5
ghr-miR2949a-5p				1242				−21.7
ghr-miR2949b				1242			6	−21.7
ghr-miR2949c				1242			6	−21.7
ghr-miR2950	78	78	78	82	−27.38	−23.7	6.5	−30.2
ghr-miR3476-3p				2470				−22.5
ghr-miR3476-5p			765	421			6	−25.8
ghr-miR7484a			2680	1077			5	−20.9
ghr-miR7484a(1)			1081				6.5
ghr-miR7484b			2680	1077			5	−20.9
ghr-miR7484b(1)			1081				6.5
ghr-miR7485				1575				−22.2
ghr-miR7486a	2488	2488	2488	849	−23.15	−21.3	5	−30.7
ghr-miR7486a (1)	846				−29.28
ghr-miR7486b	2488	2488	2488	849	-23.15	−21.3	5	−30.7
ghr-miR7486b (1)	846				−29.28
ghr-miR7487				1566				−23.6
ghr-miR7488				2258				−24.2
ghr-miR7489		1408		1447	−16.5			−24.6
ghr-miR7490				562				−23.5
ghr-miR7491				1743				−28.7
ghr-miR7492a			901	2566			5.5	−23.9
ghr-miR7492a (1)			1094				6.5
ghr-miR7492b			901	2566			5.5	−23.9
ghr-miR7492b(1)			1094				6.5
ghr-miR7492c			901	2566			5.5	−23.9
ghr-miR7492c(1)			1094				6.5
ghr-miR7493				1352				−20.7
ghr-miR7494				1300				−21.6
ghr-miR7495a				2276				−21
ghr-miR7495b				2276				−21
ghr-miR7496a
ghr-miR7496b
ghr-miR7497	349		155	362	−22.59		6	−28.4
ghr-miR7497(1)			459				6.5	−30.9
ghr-miR7498				370				−23.1
ghr-miR7499
ghr-miR7500			674	2467			6	−24.9
ghr-miR7501				2428				−24.8
ghr-miR7502
ghr-miR7503	2214			2214	−23.35			−27
ghr-miR7504a				670				−21.5
ghr-miR7504b				1478				−21.5
ghr-miR7505			2049	2036			6	−24.7
ghr-miR7506	509			1795	−23.33			−30.3
ghr-miR7507				364				−25.4
ghr-miR7508				2282				−21.8
ghr-miR7509				2162				−20.8
ghr-miR7510a			805	694			6.5	−27.9
ghr-miR7510b			1581	2175			5.5	−24.6
ghr-miR7511				1399				−22.5
ghr-miR7512		917		917		−16.7		−23.5
ghr-miR7513	1350	1350	2540	1351	−21.45	−17.5	6	−26.8
ghr-miR7514				1522				−20.7
miRNAs	10	11	20	76
loci	12	11	26	76
Common Loci	4
Consensual miRNAs	7
