# Supplementary material for: Genome-Wide Identification of Cotton MicroRNAs Predicted for Targeting Cotton Leaf Curl Kokhran Virus-Lucknow
Source: Preprints.org preprint supplement (doi:10.20944/preprints202309.1992.v1), 2023-09-28
Supplement: Supplementary file 4 [file Table S4.xlsx]

## Sheet: Sheet1
Cotton miRNAs	Position miRanda	Genes	PositionRNA22	Genes	Position psRNATarget	Genes	Position RNAhybrid	Genes
ghr-miR156a							2500	C1
ghr-miR156b							2500	C1
ghr-miR156c							2500	C1
ghr-miR156d							2500	C1
ghr-miR160							2044	C1/C4
ghr-miR162a							1665	C1
ghr-miR164							375	V1/V2
ghr-miR166b							2038	C1
ghr-miR167a							1400	C2/C3
ghr-miR167b							1400	C2/C3
ghr-miR169a			691	V1			1820	C1
ghr-miR169b							2180	C1/C4
ghr-miR172							2177	C1/C4
ghr-miR390a	2278	C4/C1	2281	C1/C4			2196	C1/C4
ghr-miR390b	2278	C4/C1	2281	C1/C4			2196	C1/C4
ghr-miR390c	2278	C4/C1	2281	C1/C4			2196	C1/C4
ghr-miR393			1735	C1			611	V1
ghr-miR394a							1459	C2
ghr-miR394b							1459	C2
ghr-miR396a					1250	C2/C3	1226	C2/C3
ghr-miR396b					1250	C2/C3	1226	C2/C3
ghr-miR398							2469	C1
ghr-miR399a							2633	LIR
ghr-miR399b							2633	LIR
ghr-miR399c							2616	LIR
ghr-miR399d							2047	C1/C4
ghr-miR399e							2615	LIR
ghr-miR479							371	V1/V2
ghr-miR482a							581	V1
ghr-miR482b							581	V1
ghr-miR827a					740	V1	2473	C1
ghr-miR827b					740	V1	2473	C1
ghr-miR827c					740	V1	2473	C1
ghr-miR2948-5p							2611	LIR
ghr-miR2949a-3p							1655	C1
ghr-miR2949a-5p							1242	C2/C3
ghr-miR2949b							1242	C2/C3
ghr-miR2949c							1242	C2/C3
ghr-miR2950	78	LIR	78	LIR	78	LIR	82	LIR
ghr-miR3476-3p							2470	C1
ghr-miR3476-5p					765	V1	421	V1/V2
ghr-miR7484a					2680	LIR	1077	C3
ghr-miR7484a(1)					1081	C3
ghr-miR7484b					2680	LIR	1077	C3
ghr-miR7484b(1)					1081	C3
ghr-miR7485							1575	C1/C2
ghr-miR7486a	2488	C1	2488	C1	2488	C1	849	V1
ghr-miR7486a (1)	846	V1
ghr-miR7486b	2488	C1	2488	C1	2488	C1	849	V1
ghr-miR7486b (1)	846	V1
ghr-miR7487							1566	C1/C2
ghr-miR7488							2258	C1/C4
ghr-miR7489			1408	C2/C3			1447	C2/C3
ghr-miR7490							562	V1
ghr-miR7491							1743	C1
ghr-miR7492a					901	V1	2566	C1
ghr-miR7492a (1)					1094	C3
ghr-miR7492b					901	V1	2566	C1
ghr-miR7492b(1)					1094	C3
ghr-miR7492c					901	V1	2566	C1
ghr-miR7492c(1)					1094	C3
ghr-miR7493							1352	C2/C3
ghr-miR7494							1300	C2/C3
ghr-miR7495a							2276	C1/C4
ghr-miR7495b							2276	C1/C4
ghr-miR7496a
ghr-miR7496b
ghr-miR7497	349	V1/V2			155	LIR/V2	362	V1/V2
ghr-miR7497(1)					459	V1/V2
ghr-miR7498							370	V1/V2
ghr-miR7499
ghr-miR7500					674	V1	2467	C1
ghr-miR7501							2428	C1
ghr-miR7502
ghr-miR7503	2214	C4/C1					2214	C1/C4
ghr-miR7504a							670	V1
ghr-miR7504b							1478	C2
ghr-miR7505					2049	C1	2036	C1
ghr-miR7506	509	V1					1795	C1
ghr-miR7507							364	V1/V2
ghr-miR7508							2282	C1/C4
ghr-miR7509							2162	C1/C4
ghr-miR7510a					805	V1	694	V1
ghr-miR7510b					1581	C1/C2	2175	C1/C4
ghr-miR7511							1399	C2/C3
ghr-miR7512			917	V1			917	V1
ghr-miR7513	1350	C2/C3	1350	C2/C3	2540	C1	1351	C2/C3
ghr-miR7514							1522	C1/C2
miRNAs	10		11		20		76
Loci	12		11		26		76
V1	3		2		9		9
V2
V1/V2	1				1		21
C1	2		3				18
C2
C1/C2
C2
C3
C2/C3	1
C4/C1	4
LIR
